1 **Temporal inhibition of autophagy reveals segmental reversal of aging with**  
2 **increased cancer risk**

3 Liam D Cassidy<sup>1</sup>, Andrew RJ Young<sup>1</sup>, Christopher NJ Young<sup>2</sup>, Elizabeth J Soilleux<sup>3</sup>,  
4 Edward Fielder<sup>4</sup>, Bettina M Weigand<sup>4</sup>, Rebecca Brais<sup>5</sup>, Kimberley A Wiggins<sup>6</sup>, Murray  
5 CH Clarke<sup>6</sup>, Diana Jurk<sup>4,7</sup>, Joao F Passos<sup>4,7</sup>, Masashi Narita<sup>1\*</sup>

6

7 <sup>1</sup> University of Cambridge, Cancer Research UK Cambridge Institute, Robinson Way,  
8 Cambridge, CB2 0RE, UK

9 <sup>2</sup>Leicester Institute for Pharmaceutical Innovation, Faculty of Health and Life Sciences,  
10 De Montfort University, Leicester, LE1 5RR, UK

11 <sup>3</sup>Division of Cellular and Molecular Pathology, Department of Pathology, University of  
12 Cambridge, Addenbrookes Hospital, Hills Road, Cambridge, CB2 0QQ, UK

13 <sup>4</sup> Ageing Research Laboratories, Newcastle University Institute for Ageing, Institute for  
14 Cell and Molecular Biosciences, Newcastle University, Newcastle upon Tyne NE4  
15 5PL, UK

16 <sup>5</sup> Department of Histopathology, Cambridge University Hospitals NHS Foundation  
17 Trust, Cambridge, UK

18 <sup>6</sup> Division of Cardiovascular Medicine, University of Cambridge, Addenbrookes  
19 Hospital, Hills Road, Cambridge CB2 0QQ, UK

20 <sup>7</sup> Department of Physiology and Biomedical Engineering, Mayo Clinic, Rochester, MN,  
21 United States

22 \*Correspondence to Masashi.Narita@cruk.cam.ac.uk

23 **Abstract**

24 Autophagy is an important cellular degradation pathway with a central role in  
25 metabolism as well as basic quality control, two processes inextricably linked to aging.  
26 A decrease in autophagy is associated with increasing age, yet it is unknown if this is  
27 causal in the aging process, and whether autophagy restoration can counteract these  
28 aging effects. Here we demonstrate that systemic autophagy inhibition induces the  
29 premature acquisition of age-associated phenotypes and pathologies in mammals.  
30 Remarkably, autophagy restoration provides a near complete recovery of morbidity  
31 and a significant extension of lifespan, however, at the molecular level this rescue  
32 appears incomplete. Importantly autophagy-restored mice still succumb earlier due to  
33 an increase in spontaneous tumor formation. Thus our data suggest that chronic  
34 autophagy inhibition confers an irreversible increase in cancer risk and uncovers a  
35 biphasic role of autophagy in cancer development being both tumor suppressive and  
36 oncogenic, sequentially.

## 37 **Main Text**

38 Physiological aging is a complex and multifaceted process associated with the  
39 development of a wide array of degenerative disease states. While there is no  
40 accepted singular underlying mechanism of aging, a combination of genetic,  
41 environmental and metabolic factors have been shown to alter the aging process<sup>1-3</sup>.  
42 As such, lifestyle and pharmacological regimens have been proposed that may offer  
43 health- and or life-span benefits<sup>4-6</sup>. However, despite chronological aging representing  
44 the greatest risk factor for pathological conditions as diverse as neurodegeneration,  
45 cancer, and cardiovascular disease, there is a paucity of genetic mammalian models  
46 that allow for dynamic modulation of key processes in mammalian aging.

47

48 Autophagy is an evolutionarily conserved bulk cellular degradation system that  
49 functions to breakdown and recycle a wide array of cytoplasmic components from  
50 lipids, proteins and inclusion bodies, to whole organelles (e.g. mitochondria).  
51 Importantly a reduction in autophagic flux (the rate at which autophagosomes form and  
52 breakdown cellular contents) is associated with increasing age in mammals<sup>7</sup>. Evidence  
53 from lower organisms suggests that autophagy inhibition can negate the positive-  
54 effects of regimens that extend lifespan, such as calorie restriction, rapamycin  
55 supplementation, and mutations in insulin signalling pathways<sup>8-10</sup>.

56

57 In mice, the constitutive promotion of autophagy throughout lifetime has been shown  
58 to extend health- and life-span in mammalian models<sup>11,12</sup>. These studies have provided  
59 hitherto missing evidence that autophagic flux can impact on mammalian longevity and  
60 supports the notion that the pharmacological promotion of autophagy may extend  
61 health-, and potentially life-span, in humans. However, whether a reduction in  
62 autophagy is sufficient to induce phenotypes associated with aging, and whether these  
63 effects can be reversed by restoring autophagy has to date not been addressed.

64 Considering that the therapeutic window for pharmacological intervention to counteract  
65 aging, and age-related diseases, will be later in life (as opposed to from conception),  
66 after autophagic flux has declined, it is critical to understand how the temporal  
67 modulation (inhibition and restoration) of autophagy may impact on longevity and  
68 health.

69

70 To address these questions, we use two doxycycline (dox) inducible shRNA mouse  
71 models that target the essential autophagy gene Atg5 (Atg5i mice) to demonstrate that  
72 autophagy inhibition in young adult mice is able to drive the development of aging-like  
73 phenotypes and reduce longevity. Importantly we confirm that the restoration of  
74 autophagy is associated with a substantial restoration of health- and life-span, however  
75 this recovery is incomplete. Notably the degree of recovery is segmental, being  
76 dependent on both the tissue and metric analysed. A striking consequence of this  
77 incomplete restoration is that autophagy restored mice succumb to spontaneous tumor  
78 formation earlier and at an increased frequency than control mice, a phenotype not  
79 observed during autophagy inhibition alone. As such our studies indicate that despite  
80 the significant benefit, autophagy reactivation may also promote tumorigenesis in  
81 advanced ageing context.

82

### 83 **Reduced lifespan in Atg5i mice**

84 Previously, we have reported the development of a highly efficient dox inducible  
85 shRNA mouse model targeting Atg5 (Atg5i)<sup>13</sup> that phenocopies tissue-specific Atg5  
86 knockout (KO) mice. These mice lack brain expression of the shRNA and as such do  
87 not suffer from the lethal neurotoxic effects that characterise systemic autophagy  
88 knockout mice<sup>14,15</sup>, and enable us to perform longitudinal studies that were previously  
89 unachievable *in vivo*.

90

91 A common caveat of many mouse models is that genetic manipulations are often  
92 present during embryogenesis. Thus, any phenotypes that manifest are a combination  
93 of both developmental and tissue homeostasis effects. To avoid the generation of  
94 these compound effects, Atg5i mice were aged until eight-weeks (young adults) before  
95 being transferred to a dox-containing diet and followed to assess overall survival. Atg5i  
96 mice on long-term dox (LT-Atg5i) had a median survival of ~six months on dox (Male  
97 185 days; Female 207 days on dox) with no apparent sex bias (Fig. 1a-c and  
98 Supplementary Fig. 1a).

99

100 In comparison to littermate controls, LT-Atg5i mice experienced a progressive  
101 deterioration, initially presenting with a reduction in coat condition within the first few  
102 weeks and a reduction in weight gain that became more pronounced over the life of  
103 the animal (Fig. 1d, e and Supplementary Fig. 1b). The majority of mice eventually  
104 succumbed to a general morbidity characterised by lethargy, piloerection, and a  
105 decrease in body condition, wherein they have to be sacrificed. As previously  
106 described with naturally aged colonies<sup>16</sup>, LT-Atg5i mice also appeared susceptible to  
107 eye infections and ulcerative dermatitis, the later being primarily localised to the ears  
108 and neck and ranging from mild to severe (Fig. 1f and Supplementary Fig. 1c,  
109 respectively).

110

111 A singular cause of death in LT-Atg5i mice is difficult to determine and it is most likely  
112 of multifactorial aetiology across the cohort. At necropsy, all mice displayed  
113 hepatomegaly and splenomegaly in comparison to age and sex matched controls,  
114 consistent with phenotypes associated with tissue specific knockout mice<sup>17-19</sup>. Elevated  
115 serum ALT and reduced levels of serum albumin were present throughout dox  
116 administration of Atg5i mice, yet were altered further at the time of death only in a  
117 subset of samples (Supplementary Fig. 1f, g, yellow circles). Consistent with this, an

118 increase in serum bilirubin levels was only observed at the time of death within this  
119 same subset of mice (Supplementary Fig. 1h, yellow circle). These data suggest that  
120 severe liver failure occurs in only a fraction.

121

122 Interestingly serum creatinine levels, a marker of kidney function, also displayed an  
123 increase only in a different subset of LT-Atg5i mice at the time of death, although they  
124 were not generally high during dox administration (Supplementary Fig. 2a). Loss of  
125 autophagy also correlated with a general thickening of the basement membrane and  
126 the presence of sclerotic (Supplementary Fig. 2b) and enlarged glomeruli  
127 (Supplementary Fig. 2c, d) in comparison to age-matched tissue samples, indicative  
128 of degenerative kidney disorder. LT-Atg5i mice also stained positively for the build-up  
129 of toxic amyloid proteins and the autophagy adaptor protein p62/Sqstm1, a condition  
130 normally associated with advancing age in humans (Supplementary Fig. 2e, f). These  
131 data suggest that, similar to the liver, systemic autophagy defect causes age-related  
132 degenerative alterations in kidney, yet only a distinct subset progresses to renal failure  
133 on death. In addition to this stochastic development of organ failure, LT-Atg5i mice  
134 universally presented with cardiomyopathy (Supplementary Fig. 2g). Histological  
135 examination highlighted the presence of enlarged, degenerate and vacuolated  
136 cardiomyocytes, in addition to the presence of cardiac fibrosis (Fig. 1g).

137

138 Together, our data suggest that, despite the stereotypic premature death, LT-Atg5i  
139 mice suffered from a heterogeneous set of tissue degenerative disorders that appear  
140 to have contributed to an increase in mortality. Of note, there was no evidence of overt  
141 tumor development in these mice.

142

143 **Autophagy inhibition is associated with accelerated aging**

144 All LT-Atg5i mice displayed evidence of kyphosis after four months of dox treatment  
145 that became progressively more pronounced as the animals aged until death, whilst  
146 16/28 LT-Atg5i mice displayed evidence of premature greying to varying degrees (Fig.  
147 1h). Furthermore LT-Atg5i mice displayed evidence of extramedullary hematopoiesis  
148 (Fig. 2a) and immune aggregations, commonly seen in aged mouse colonies, were  
149 also found in the liver, lungs and kidneys but were generally absent in age matched  
150 controls, although incidence of these increased in frequency with increasing age  
151 (Supplementary Fig. 3a).

152

153 As previously described in hematopoietic Atg5 KO mice, LT-Atg5i mice also displayed  
154 an increase in cellularity of the peripheral immune system<sup>18,20</sup> (Supplementary Fig. 3b)  
155 with a myeloid skewing (Fig. 2b) reminiscent of age-associated chronic inflammation.  
156 This ‘inflamm-aging’ phenotype was further supported by an increase in serum TNF  
157 and IL-6 in LT-Atg5i mice in comparison to control (Fig. 2c).

158

159 Skeletal muscle exhibits an age-related decline and autophagy has been reported to  
160 be required for the maintenance of Pax7 positive satellite cells (myogenic precursors)  
161<sup>21</sup>. In accordance, LT-Atg5i mice displayed evidence of skeletal muscle degeneration  
162 with the presence of smaller fibres, a reduction in the population of Pax7 positive  
163 satellite cells, and an increase in central nucleation in comparison to age-matched  
164 littermate control mice (Fig. 2d-g). Central nucleation represents muscle fibre  
165 regeneration after acute muscle injury but an increase in basal frequency of centrally  
166 nucleated myofibres is also a sign of sarcopenia at geriatric age both in mice and  
167 human<sup>22</sup>. Additionally, LT-Atg5i muscle fibres displayed increased staining positivity  
168 for the mitochondrial marker TOM20 indicative of increased mitochondrial mass and a  
169 reduction in autophagy mediated turnover (Fig. 2h).

170

171 The accumulation of senescent cells is considered a key marker of chronological  
172 aging. Autophagy has been reported to have context dependent and sometimes  
173 opposing roles during cellular senescence: typically basal autophagy is considered to  
174 promote fitness and its loss may promote senescence, whereas in oncogene-induced  
175 senescence, autophagy may be important for the establishment of senescent  
176 phenotypes<sup>23-26</sup>. To determine if the systemic loss of basal autophagy is sufficient to  
177 drive the establishment of cellular senescence *in vivo* we performed western blotting  
178 across a number of tissues from 4-month dox treated LT-Atg5i mice and found an  
179 increased staining pattern for key senescence markers (i.e. p16, p21, and p53) (Fig.  
180 3a-c and Supplementary Fig. 3c). Additionally, whole mount senescence-associated  
181 beta-galactosidase staining from 6-month treated livers highlighted a marked increase  
182 in staining patterns in comparison to LT-Control mice (Fig. 3d). Histologically, nuclear  
183 accumulation of p21 was also evident, particularly in hepatocytes with enlarged  
184 morphology (Fig. 3d). Furthermore LT-Atg5i mice display a significant increase in both  
185 the abundance and frequency of telomere-associated  $\gamma$ -H2AX foci (TAF), which have  
186 been shown to correlate with senescence, increasing age and mitochondrial  
187 dysfunction (Fig. 3e, f)<sup>27-29</sup>. These data reinforce the age acceleration upon systemic  
188 autophagy reduction.

189

190 Of note, similar gross phenotypic results were also seen in mice with a second hairpin  
191 targeting Atg5 (LT-Atg5i\_2). LT-Atg5i\_2 mice display evidence of premature aging-like  
192 phenotypes (Supplementary Fig. 4a-c), however the appearance of these phenotypes  
193 is delayed in comparison to LT-Atg5i mice, seemingly due to a hypomorphic reduction  
194 in Atg5. Accordingly, these mice displayed the accumulation of p62/Sqstm1 and LC3  
195 in multiple tissues but at lower levels in comparison to LT-Atg5i mice, and did not  
196 display phenotypes associated with complete Atg5 knockout mice, including



197 hepatomegaly and splenomegaly (Supplementary Fig. 4d-f). These findings in  
198 particular are important as they establish that the reduction in longevity and presence  
199 of aging phenotypes is not dependent on the hepatomegaly and splenomegaly  
200 phenotypes encountered in the original LT-Atg5i mouse strain with the highest degree  
201 of autophagy inhibition.

202

203 Combined these data support a role for basal autophagy in maintaining tissue and  
204 organismal homeostasis and provide evidence that causally links autophagy inhibition  
205 to the induction of aging-like phenotypes in mammals.

206

### 207 **Autophagy Restoration Partially Reverses Accelerated Aging-like Phenotypes**

208 We next sought to determine whether autophagy restoration alone is able to reverse  
209 the aging-like phenotypes by removing dox from the diet. Eight-week old Atg5i and  
210 control mice treated with dox for four months, the point at which they universally  
211 presented with kyphosis, were switched back to a diet absent of dox leading to a  
212 restoration in Atg5 levels and autophagy (termed R-Atg5i cohort)<sup>13</sup>. Interestingly the  
213 senescence marker p21 remained elevated across a number of tissues 2 months post  
214 dox removal (Fig. 4a, b).

215

216 An increase in chronological age is generally associated with the deviations in multiple  
217 health parameters that when measured can be combined into a clinical ‘frailty-score’  
218<sup>30</sup>. As expected R-Atg5i mice displayed an initial increase in their frailty scores during  
219 autophagy inhibition in comparison to littermate controls, yet once mice have been  
220 switched back to a diet absent of dox, the frailty scores displayed a significant decrease  
221 over the next four months (Fig. 4c, Supplementary Movie. 1). In contrast, LT-Atg5i mice  
222 treated on dox for 6 months (median survival is around ~6 months on dox) continued  
223 to display a significant difference in their frailty scores, while almost all LT-Atg5i mice

224 had already succumbed by eight-months (Fig. 4c). A similar increase in frailty was also  
225 noted in the LT-Atg5i<sub>2</sub> cohorts (Supplementary Fig. 4b). The penetrant kyphosis  
226 phenotype was largely irreversible, however 3/26 R-Atg5i mice did show evidence of  
227 recovery from kyphosis, while no mice displayed a reversal of the greying phenotypes.  
228 As such, while autophagy inhibition *in vivo* appears to promote frailty, autophagy  
229 restoration is seemingly able to substantially reverse this effect.

230

231 Remarkably the profound immune-associated phenotypes that we observed in  
232 autophagy-deficient LT-Atg5i mice were reversed in R-Atg5i mice. Serum markers of  
233 inflammation and WBC counts were indistinguishable between R-Atg5i and R-Control  
234 mice (Fig. 4d, e and Supplementary Fig. 5a). However, it should be noted that there  
235 was a trend towards a larger red blood cell distribution width (RDW) in aged R-Atg5i  
236 mice removed from dox for 8 months (14 months old), which has previously been linked  
237 to a range of diseases and an increased risk of acute myeloid leukemia (AML) (Fig. 4f)  
238 <sup>31</sup>. Additionally, R-Atg5i livers displayed a complete reversal of hepatomegaly and  
239 serum ALT levels (Supplementary Fig. 5c and c). The kidneys of R-Atg5i mice  
240 appeared to recover from autophagy inhibition and lacked evidence of sclerotic and  
241 enlarged glomeruli (Supplementary Fig. 5 d-f). Consistently, serum albumin levels  
242 displayed evidence of normalisation, although there was still a trend for reduced levels  
243 in R-Atg5i mice at the time point tested, suggesting that liver and/or kidney functions  
244 are largely recovered, if not completely (Supplementary Fig. 5g).

245

246 Similarly, the protein aggregation marker p62/SQSTM1 in the liver appeared much  
247 reduced in R-Atg5i mice in comparison to the LT-Atg5i mice, yet a small but substantial  
248 number of cells still exhibited a marked accumulation of p62 aggregation in R-Atg5i  
249 mice that had been off dox for four months (Fig. 5a). Additionally, R-Atg5i livers were  
250 also found to contain the presence of ceroid-laden macrophages and lipofuscin  
251 positivity, pigments known to increase with age and not seen in age-matched controls

252 mice (Fig. 5b). Importantly, and in accordance with this partial restoration phenotype,  
253 molecular markers of aging such as TAF also remained significantly elevated in R-  
254 Atg5i mice. This is consistent with the persistent nature of telomeric DNA damage,  
255 which is reported to be irreparable<sup>27,32</sup>. Together with other senescence markers (Fig.  
256 4b), these data suggest that a portion of the cellular damage caused by a chronic block  
257 in autophagy is irreversible (Fig. 5c).

258

259 Morphological analysis of skeletal muscle from R-Atg5i mice with autophagy restored  
260 suggests that muscle fibre size and morphology display no sign of recovery at the  
261 timepoint analysed (Fig. 5d, e and Supplementary Fig. 6a, b). However central  
262 nucleation and satellite cell frequency appeared to display a heterogeneous pattern,  
263 with evidence of recovery apparent in some individuals (Fig. 5f, g). As expected with  
264 Atg5 restoration, mitochondrial levels as determined by Tom20 positivity were restored  
265 to control levels (Fig. 5h). Additionally, the cardiac fibrosis observed LT-Atg5i mice  
266 appears to still be present four months post dox removal in R-Atg5i cohorts  
267 (Supplementary Fig. 6c). Together these data suggest that autophagy restoration may  
268 have tissue and pathology specific limitations in the capacity to recover from the tissue  
269 and cellular damage induced upon its inhibition. Crucially, whilst some tissues, such  
270 as the liver, appear to recover, they are still associated with age-associated  
271 pathologies at the molecular level.

272

### 273 **Accelerated tumor development in R-Atg5i mice**

274 As R-Atg5i mice displayed some evidence of organismal rejuvenation and an increase  
275 in overall health, we sought to determine if autophagy restoration is able to reinstate  
276 natural longevity to the level seen in littermate control mice, or whether the damage  
277 accumulation impacting on lifespan was irreversible. Remarkably, while the life-span  
278 of R-Atg5i mice was significantly extended in comparison to LT-Atg5i mice (median  
279 survival 493 days versus 185 days since treatment began, respectively), it was also

280 significantly shorter than the R-Control cohorts (Fig. 6a). In marked contrast to LT-  
281 Atg5i mice, the cause of death was predominantly associated with the development of  
282 tumors with an increased frequency and at earlier timepoints (Fig. 6b-d). Of note a  
283 whole-body mosaic Atg5 knockout mouse model has been previously reported to only  
284 develop liver adenomas but without any malignant tumors<sup>33</sup>. Together, our data  
285 suggest that a temporary period of autophagy inhibition may be enough to induce  
286 irreversible cellular damage, which might facilitate tumor development cooperatively  
287 with the restoration of autophagy.

288

## 289 **Discussion**

290 While the rate of autophagic flux is believed to decrease with advancing age and has  
291 been postulated to be a driver of aging in multicellular organisms, evidence in  
292 mammals has been limited to the role of autophagy in maintaining stem cell  
293 populations<sup>18,21</sup>. Such systemic organismal studies have been impossible to conduct  
294 owing to the embryonic or neonatal lethality, and rapid neurotoxicity in adult mice, that  
295 accompanies systemic autophagy ablation<sup>14,34</sup>. The temporal control and lack of brain  
296 shRNA expression afforded by the Atg5i model have enabled us to circumvent these  
297 barriers, and separate developmental from tissue homeostatic effects that cannot be  
298 distinguished in aging models based on constitutive or *in utero* genetic modifications.  
299 Our findings support the theory that a reduction in autophagy is sufficient to induce  
300 several molecular and phenotypic characteristics associated with mammalian aging,  
301 including the development of age-associated diseases and a reduction in longevity.  
302 Here it is notable that our Atg5i mice phenocopy other models of aging driven by the  
303 accumulation of damage and in particular mitochondrial dysfunction<sup>35,36</sup>.

304

305 Several health and life-span extending regimens in mammals, such as calorie  
306 restriction or pharmacological modulation, have been posited to exert their effects  
307 through the regulation of autophagy<sup>7,37</sup>. However, these effects are also pleiotropic in

308 nature and alter a multitude of cellular processes, making it impossible to deconvolute  
309 and ascribe the role of autophagy in these settings. Whilst recent genetic models that  
310 promote autophagic flux continuously throughout life have demonstrated an extension  
311 of health- and life-span in mammalian systems<sup>11,12</sup>, it is unclear if the damage  
312 established by a loss of autophagy is sufficient for age acceleration and can be  
313 reversed. If therapeutic regimens in humans are to be established later in life, once  
314 autophagy-associated damage has accumulated, ascertaining the capacity for  
315 autophagy restoration to repair this damage is critical. In our model, systemic  
316 inflammation and frailty scores displayed a marked improvement upon autophagy  
317 restoration, which resulted in increased survival. However, while some tissues (i.e.  
318 liver and heart) displayed macroscopic normalisation, further analysis highlighted the  
319 persistence of pathological phenotypes. Our results indicate that the reversibility of  
320 markers of aging such as TAF, or macroscopic phenotypes such as greying and  
321 kyphosis may not recover. It should also be noted that we have chosen a late time-  
322 point to restore autophagy as this provided a clear and ubiquitous distinction between  
323 control and autophagy inhibited mice, shorter time points or intermittent dosing  
324 regimens may display further heterogeneity in damage and recovery phenotypes.

325

326 Our unexpected finding, that the temporal inhibition of autophagy predisposes to  
327 increased tumor development, provides a potential genetic explanation for the context-  
328 dependent role of autophagy in tumorigenesis<sup>38,39</sup>: i.e. autophagy can be a tumor  
329 suppressor<sup>33,40,41</sup> or a tumor promoter<sup>42-44</sup>. The irreversible damage induced by  
330 autophagy inhibition (e.g. genomic instability), might confer tumor susceptibility, while  
331 autophagy activity is perhaps required for actual malignant transformation. The clinical  
332 implication of our data is not limited to the advanced age state. As some  
333 pathophysiological states, such as obesity, are associated with an insufficient level of  
334 autophagy<sup>45</sup>, it would be interesting to determine if obese individuals retain an

335 increased risk of tumor development even upon weight loss, in comparison to never

336 obese populations.

337

338 **References and Notes**

- 339 1. Partridge, L., Deelen, J. & Slagboom, P. E. Facing up to the global challenges  
340 of ageing. *Nature* **561**, 45–56 (2018).
- 341 2. Sen, P., Shah, P. P., Nativio, R. & Berger, S. L. Epigenetic Mechanisms of  
342 Longevity and Aging. *Cell* **166**, 822–839 (2016).
- 343 3. López-Otín, C., Galluzzi, L., Freije, J. M. P., Madeo, F. & Kroemer, G.  
344 Metabolic Control of Longevity. *Cell* **166**, 802–821 (2016).
- 345 4. Newman, J. C. *et al.* Strategies and Challenges in Clinical Trials Targeting  
346 Human Aging. *J. Gerontol. A Biol. Sci. Med. Sci.* **71**, 1424–1434 (2016).
- 347 5. Colman, R. J. *et al.* Caloric restriction reduces age-related and all-cause  
348 mortality in rhesus monkeys. *Nat Commun* **5**, 3557 (2014).
- 349 6. Mattison, J. A. *et al.* Impact of caloric restriction on health and survival in  
350 rhesus monkeys from the NIA study. *Nature* **489**, 318–321 (2012).
- 351 7. Rubinsztein, D. C., Mariño, G. & Kroemer, G. Autophagy and Aging. *Cell* **146**,  
352 682–695 (2011).
- 353 8. Meléndez, A. *et al.* Autophagy genes are essential for dauer development  
354 and life-span extension in *C. elegans*. *Science* **301**, 1387–1391 (2003).
- 355 9. Bjedov, I. *et al.* Mechanisms of life span extension by rapamycin in the fruit fly  
356 *Drosophila melanogaster*. *Cell Metab.* **11**, 35–46 (2010).
- 357 10. Jia, K. & Levine, B. Autophagy is required for dietary restriction-mediated life  
358 span extension in *C. elegans*. *Autophagy* **3**, 597–599 (2007).
- 359 11. Fernández, Á. F. *et al.* Disruption of the beclin 1-BCL2 autophagy regulatory  
360 complex promotes longevity in mice. *Nature* **125**, 85 (2018).
- 361 12. Pyo, J.-O. *et al.* Overexpression of Atg5 in mice activates autophagy and  
362 extends lifespan. *Nat Commun* **4**, 2300 (2013).
- 363 13. Cassidy, L. D. *et al.* A novel Atg5-shRNA mouse model enables temporal  
364 control of Autophagy in vivo. *Autophagy* 1–11 (2018).
- 365 doi:10.1080/15548627.2018.1458172

- 366 14. Komatsu, M. *et al.* Loss of autophagy in the central nervous system causes  
367 neurodegeneration in mice. *Nature* **441**, 880–884 (2006).
- 368 15. Menzies, F. M., Fleming, A. & Rubinsztein, D. C. Compromised autophagy  
369 and neurodegenerative diseases. *Nat. Rev. Neurosci.* **16**, 345–357 (2015).
- 370 16. Pettan-Brewer, C. & Treuting, P. M. Practical pathology of aging mice.  
371 *Pathobiol Aging Age Relat Dis* **1**, 393 (2011).
- 372 17. Komatsu, M. *et al.* Impairment of starvation-induced and constitutive  
373 autophagy in Atg7-deficient mice. *J Cell Biol* **169**, 425–434 (2005).
- 374 18. Ho, T. T. *et al.* Autophagy maintains the metabolism and function of young  
375 and old stem cells. *Nature* **543**, 205–210 (2017).
- 376 19. Mortensen, M. *et al.* Loss of autophagy in erythroid cells leads to defective  
377 removal of mitochondria and severe anemia in vivo. *Proc. Natl. Acad. Sci. U.S.A.*  
378 **107**, 832–837 (2010).
- 379 20. Watson, A. S. *et al.* Autophagy limits proliferation and glycolytic metabolism in  
380 acute myeloid leukemia. *Cell Death Discov* **1**, 371 (2015).
- 381 21. García-Prat, L. *et al.* Autophagy maintains stemness by preventing  
382 senescence. *Nature* **529**, 37–42 (2016).
- 383 22. Sousa-Victor, P. *et al.* Geriatric muscle stem cells switch reversible  
384 quiescence into senescence. *Nature* **506**, 316–321 (2014).
- 385 23. Young, A. R. J. *et al.* Autophagy mediates the mitotic senescence transition.  
386 *Genes Dev.* **23**, 798–803 (2009).
- 387 24. Narita, M. *et al.* Spatial coupling of mTOR and autophagy augments secretory  
388 phenotypes. *Science* **332**, 966–970 (2011).
- 389 25. Kang, H. T., Lee, K. B., Kim, S. Y., Choi, H. R. & Park, S. C. Autophagy  
390 impairment induces premature senescence in primary human fibroblasts. *PLoS ONE*  
391 **6**, e23367 (2011).
- 392 26. Dörr, J. R. *et al.* Synthetic lethal metabolic targeting of cellular senescence in  
393 cancer therapy. *Nature* **501**, 421–425 (2013).



- 394 27. Hewitt, G. *et al.* Telomeres are favoured targets of a persistent DNA damage  
395 response in ageing and stress-induced senescence. *Nat Commun* **3**, 708 (2012).
- 396 28. Correia-Melo, C. *et al.* Mitochondria are required for pro-ageing features of  
397 the senescent phenotype. *EMBO J.* **35**, 724–742 (2016).
- 398 29. Jurk, D. *et al.* Chronic inflammation induces telomere dysfunction and  
399 accelerates ageing in mice. *Nat Commun* **2**, 4172 (2014).
- 400 30. Whitehead, J. C. *et al.* A clinical frailty index in aging mice: comparisons with  
401 frailty index data in humans. *J. Gerontol. A Biol. Sci. Med. Sci.* **69**, 621–632 (2014).
- 402 31. Abelson, S. *et al.* Prediction of acute myeloid leukaemia risk in healthy  
403 individuals. *Nature* **559**, 400–404 (2018).
- 404 32. Fumagalli, M. *et al.* Telomeric DNA damage is irreparable and causes  
405 persistent DNA-damage-response activation. *Nat. Cell Biol.* **14**, 355–365 (2012).
- 406 33. Takamura, A. *et al.* Autophagy-deficient mice develop multiple liver tumors.  
407 *Genes Dev.* **25**, 795–800 (2011).
- 408 34. Karsli-Uzunbas, G. *et al.* Autophagy is required for glucose homeostasis and  
409 lung tumor maintenance. *Cancer Discov* **4**, 914–927 (2014).
- 410 35. Trifunovic, A. *et al.* Premature ageing in mice expressing defective  
411 mitochondrial DNA polymerase. *Nature* **429**, 417–423 (2004).
- 412 36. Kujoth, G. C. *et al.* Mitochondrial DNA mutations, oxidative stress, and  
413 apoptosis in mammalian aging. *Science* **309**, 481–484 (2005).
- 414 37. Hansen, M., Rubinsztein, D. C. & Walker, D. W. Autophagy as a promoter of  
415 longevity: insights from model organisms. *Nat. Rev. Mol. Cell Biol.* **19**, 579–593  
416 (2018).
- 417 38. Guo, J. Y., Xia, B. & White, E. Autophagy-mediated tumor promotion. **155**,  
418 1216–1219 (2013).
- 419 39. Rosenfeldt, M. T. *et al.* p53 status determines the role of autophagy in  
420 pancreatic tumour development. *Nature* **504**, 296–300 (2013).

- 421 40. Qu, X. *et al.* Promotion of tumorigenesis by heterozygous disruption of the  
422 beclin 1 autophagy gene. **112**, 1809–1820 (2003).
- 423 41. Yue, Z., Jin, S., Yang, C., Levine, A. J. & Heintz, N. Beclin 1, an autophagy  
424 gene essential for early embryonic development, is a haploinsufficient tumor  
425 suppressor. *Proc. Natl. Acad. Sci. U.S.A.* **100**, 15077–15082 (2003).
- 426 42. Guo, J. Y. *et al.* Autophagy suppresses progression of K-ras-induced lung  
427 tumors to oncocytomas and maintains lipid homeostasis. *Genes Dev.* **27**, 1447–1461  
428 (2013).
- 429 43. Strohecker, A. M. *et al.* Autophagy sustains mitochondrial glutamine  
430 metabolism and growth of BrafV600E-driven lung tumors. *Cancer Discov* **3**, 1272–  
431 1285 (2013).
- 432 44. Yang, A. *et al.* Autophagy Sustains Pancreatic Cancer Growth through Both  
433 Cell-Autonomous and Nonautonomous Mechanisms. *Cancer Discov* **8**, 276–287  
434 (2018).
- 435 45. Lim, Y. M. *et al.* Systemic autophagy insufficiency compromises adaptation to  
436 metabolic stress and facilitates progression from obesity to diabetes. *Nat Commun* **5**,  
437 4934 (2014).

438

#### 439 **Acknowledgements**

440 We thank members of the Narita group, as well as K. Inoki of the University of  
441 Michigan, for their insights and suggestions. We are grateful to the following CRUK  
442 Cambridge Institute core facilities for advice and assistance: Histopathology, Light  
443 Microscopy (in particular H. Zecchini), and BRU. **Funding:** This work was supported  
444 by the University of Cambridge, Cancer Research UK and Hutchison Whampoa. The  
445 M.N. lab was supported by a Cancer Research UK Cambridge Institute Core Grant  
446 [C14303/A17197]. M.N. is also supported by The CRUK Early Detection Pump Priming  
447 Awards [C20/A20976] and Medical Research Council [MR/M013049/1]. C.N.J.Y. is  
448 supported by a DMU Early Career Fellowship. M.C.H.C is supported by grants from

449 The British Heart Foundation [FS/13/3/30038], [FS/18/19/33371], and  
450 [RG/16/8/32388]. D.J. is funded by a Newcastle University Faculty of Medical Sciences  
451 Fellowship and The Academy of Medical Sciences. J.P. was supported by the BBSRC  
452 [BB/H022384/1] and [BB/K017314/1]. **Author Contributions:** L.D.C and M.N  
453 designed the research plan and interpreted the results. A.R.Y and C.N.J.Y isolated  
454 skeletal muscle tissue. C.N.J.Y performed staining and analysis of muscle sections.  
455 E.J.S and R.B are trained pathologists and reviewed all tissue slides. E.F and M.W  
456 established and assisted with the frailty scoring. K.A.W and M.C.H.C performed serum  
457 cytokine analyses. D.J and J.F.P performed the TAF studies. L.D.C and M.N wrote the  
458 manuscript, all authors viewed and commented on. **Competing interests:** None of the  
459 authors have a competing interest to declare. **Data and materials availability:** All data  
460 and materials are available in the manuscript or upon request.  
461

462 **Methods**

463 **Atg5i mouse maintenance and aging:** The generation and initial characterization of  
464 the Atg5i transgenic line has previously been described in detail<sup>13</sup>. Mice were  
465 maintained on a mixed C57Bl/6 X 129 background with littermate controls used in all  
466 experiments. All experimental mice were maintained as heterozygous for both the  
467 shRNA allele and CAG-rtTA3 alleles, whereas control littermates were lacking one of  
468 the alleles. Guide sequences were as follows: Atg5i TATGAAGAAAGTTATCTGGGTA  
469 <sup>13</sup>; Atg5i\_2 TTATTTAAAAATCTCTCACTGT. Mice were maintained in a specific  
470 pathogen-free environment under a 12-h light/dark cycle, having free access to food  
471 and water. These mice were fed either a laboratory diet (PicoLab Mouse Diet 20, 5R58)  
472 or the same diet containing doxycycline at 200 ppm (PicoLab Mouse Diet, 5A5X). For  
473 this study mice were aged for two months before doxycycline administration in the diet.  
474 Mice were enrolled either to time-point study groups or long-term longevity cohorts  
475 (LT- and R- groups). Experienced animal technicians checked mice daily in a blinded  
476 fashion, and additionally mice were weighed and hand-checked on a weekly basis.  
477 Mice found to be of deteriorating health were culled under the advice of senior animal  
478 technicians if displaying end of life criteria. These signs include a combination of (1)  
479 hunched body position with matted fur, (2) piloerection, (3) poor body condition (BC)  
480 score (BC1 to 2), (4) failure to eat or drink, (5) cold to touch, and or (6) reduced mobility,  
481 including severe balance disturbances and ataxia. In accordance with UK home office  
482 regulations any mice suffering a 15% loss of body weight were also considered to be  
483 at an end-point. Note that for LT- longevity cohorts a portion of control mice were culled  
484 to generate age-matched littermate control tissue. These mice are marked as  
485 censored events on the survival curve. For analysis mice were treated as alive up to  
486 the point of their removal from the study where they are considered lost to follow-up  
487 and are not included in the calculations of median longevity. All experiments were  
488 performed in accordance with national and institutional guidelines, and the ethics  
489 review committee of the University of Cambridge approved this study.

490

491 **Frailty Scoring:** Clinical frailty scoring was determined using the previously published  
492 frailty index<sup>30</sup>. A blinded researcher and animal technician performed all frailty scores  
493 independently within the same 48 hr period and scores were compared afterwards to  
494 ensure accuracy of phenotype scoring.

495

496 **Pathology and Immunohistochemistry:** Explanted tissues were fixed in 10%  
497 neutral-buffered formalin solution for 24 hr and transferred to 70% ethanol. Tissues  
498 were embedded in paraffin, cut in 3µm sections on poly-lysine coated slides,  
499 deparaffinized, rehydrated, and stained with H&E. The PAS, Congo Red and Massons  
500 Trichrome histochemical stains were performed according to established protocols.  
501 An experienced pathologist reviewed all histology blinded for evidence of tumors and  
502 tissue pathologies. For immunohistochemistry and tissue immunofluorescence  
503 formalin-fixed paraffin-embedded samples were de-waxed and rehydrated. For anti-  
504 P21 (Santa Cruz, SC-6246; 1:500), and anti-TOM20 (Santa Cruz SC-11415, 1:500)  
505 staining antigen unmasking was performed with citrate buffer (10 mM sodium citrate,  
506 0.05% Tween 20, pH 6) in a pressure cooker for 5 min at 120°C. For P21 exogenous  
507 peroxidases were quenched in 3% H<sub>2</sub>O<sub>2</sub>/PBS for 15 min and the remaining steps were  
508 performed according to Vector Labs Mouse on Mouse staining kit (MP-2400). The  
509 remaining antibodies were used at the following concentrations and ran on the Leica  
510 Polymer Detection system (DS9800) with the Leica automated Bond platform: Anti-  
511 SQSTM1 (Enzo, BML-PW9860; 1:750), anti-Ki67 (Bathyl Laboratories, IHC-00375;  
512 1:1000), Anti-LC3 (Nanotools, LC3-5F10 0231-100, 1:400).

513

514 For TOM20 analysis the intensity of signal per entire muscle section was determined  
515 and an average measurement of intensity per unit area calculated. Samples were then  
516 plotted as a fold increase relative to the average intensity per unit of control muscle  
517 sections

518

519 For kidney glomeruli size tissue sections were analysed using ImageScope™ (Leica  
520 Biosystems) and the cross-sectional area of ten glomeruli in the renal cortex was  
521 reported per sample.

522

523 **Western Blotting:** Western blot analysis was performed as previously<sup>23</sup>. Tissue  
524 samples were homogenized with the Precellys 24 tissue homogenizer in laemmli  
525 buffer and samples ran on 12.5% or 15% gels. Protein was transferred to PVDF  
526 membranes (Immobilon, Millipore), which was subsequently blocked for 1 hr at room  
527 temperature (5% milk solution in TBS-Tween 0.1%) before incubating with primary  
528 antibody at 4°C overnight. An appropriate HRP-conjugated secondary antibody was  
529 incubated at room temperature for 1 hr. Western blots were visualized with  
530 chemiluminescence reagents (Sigma, RPN2106). Antibodies were used at the following  
531 concentrations: Anti-ATG5 (Abcam, ab108327; 1:1000), anti-LC3 (Abcam, ab192890;  
532 1:1000), anti-ACTIN (Santa Cruz Biotechnology, I-19; 1:5000 [no longer commercially  
533 available]), anti-P53 (Cell Signalling Technologies, Clone 1C12; 1:1000), anti-P21  
534 (Santa Cruz, SC-6246; 1:1000), anti-Histone H3 (Abcam, ab1791; 1:5000), anti-P16  
535 (Santa Cruz, SC-1207; 1:1000), anti-HMGA1 (Abcam, ab129153; 1:1000).

536

537 **Blood and serum analysis:** Whole blood composition was performed using the  
538 Mythic Hematology Analyser to determine whole blood counts, immune composition,  
539 and RDW. Mouse cytokines were determined using a cytometric bead array (BD  
540 Biosciences, Catalogue number: 552364). Sera isolated from mice were analyzed by  
541 the Core Biochemical Assay Laboratory (CBAL), Cambridge, UK for Alanine  
542 Transferase (Siemens Healthcare), Albumin (Siemens Healthcare), Bilirubin (Siemens  
543 Healthcare), and Creatinine (Siemens Healthcare) using automated Siemens  
544 Dimension RxL and ExL analyzers.

545

## 546 **Telomere Associated DNA Damage Foci (TAF)**

547 Formalin-fixed paraffin-embedded liver sections were hydrated by incubation in 100%  
548 Histoclear, 100, 95 and 2X 70% methanol for 5 min before washed in distilled water  
549 for 2X 5 min. For antigen retrieval, the slides were placed in 0.1 M citrate buffer and  
550 heated until boiling for 10 min. After cooling down to room temperature, the slides were  
551 washed 2X with distilled water for 5 min. After blocking in normal goat serum (1:60) in  
552 BSA/PBS, anti- $\gamma$ -H2A.X primary antibody (Cell Signalling Technologies, S139; 1:250)  
553 was applied and incubated at 4 °C overnight. Slides were washed 3X in PBS,  
554 incubated with secondary antibody for 30 min, washed three times in PBS and  
555 incubated with Avidin DCS (1:500) for 20 min. Following incubation, slides were  
556 washed three times in PBS and dehydrated with 70, 90 and 100% ethanol for 3 min  
557 each. Sections were denatured for 5 min at 80 °C in hybridization buffer (70%  
558 formamide (Sigma), 25 mM MgCl<sub>2</sub>, 1 M Tris pH 7.2, 5% blocking reagent (Roche)  
559 containing 2.5  $\mu$ g ml<sup>-1</sup> Cy-3-labelled telomere specific (CCCTAA) peptide nuclei acid  
560 probe (Panagene), followed by hybridization for 2 h at room temperature in the dark.  
561 The slides were washed with 70% formamide in 2xSSC for 2X 15 min, followed by  
562 2xSSC and PBS washes for 10 min. Sections were incubated with DAPI, mounted and  
563 imaged. In depth Z stacking was used (a minimum of 40 optical slices with  $\times$ 100  
564 objective) followed by Huygens (SVI) deconvolution.

565

## 566 **Senescence associated beta-galactosidase staining**

567 Whole tissue samples were washed in PBS (pH5.5) before being fixed in 0.5%  
568 Glutaraldehyde overnight and washed 2X 15 min in PBS (pH5.5) at 4°C. SA- $\beta$ -gal  
569 activity was assessed after incubation in X-Gal solution for 90 minutes at 37°C.

570

571 **Muscle Morphometric Analysis:** Mice were sacrificed at the time points described  
572 and dissected muscle was rapidly frozen in liquid nitrogen cooled isopentane to  
573 maintain structure and minimize tissue artifacts. Experimental mice and age-matched

574 littermate controls were isolated at the same time to ensure processing was consistent  
575 between groups. Frozen muscles were equilibrated in a cryostat chamber to  $-20^{\circ}\text{C}$   
576 and cryosections  $10\text{-}\mu\text{m}$  thick were then cut from the middle third of the sample and  
577 collected on poly-L-lysine ( $0.5\text{ mg/ml}$ )–coated glass slides. Sections were allowed to  
578 air dry and were then frozen at  $-80^{\circ}\text{C}$  prior to use. Samples were brought to  $4^{\circ}\text{C}$  on ice  
579 and fixed in a  $4\%$  w/v  $0.45\text{ mm}$  filtered paraformaldehyde solution in  $1\times\text{ PBS}$  for  $15$   
580 min at  $4^{\circ}\text{C}$ . PFA was removed by three  $5\text{ min}$  washes in  $1\times\text{ PBS}$ , then blocked in  $10\%$   
581 v/v serum in  $1\times\text{ PBST}$  ( $0.01\%$  Tween-20) for  $1\text{ hr}$  at RT. Primary anti-dystrophin  
582 antibody (Abcam, ab15277,  $1:1000$ ) was then applied in  $1\times\text{ PBST}$  containing  $10\%$  v/v  
583 serum for  $2\text{ h}$  at room temperature. Three  $5\text{-min}$  PBST washes were applied before  
584 secondary antibody conjugated to Alexa Fluor 647, with DAPI at  $1:1000$ , incubation in  
585 PBST and  $10\%$  v/v serum for  $1\text{ h}$  at room temperature. Sections were finally washed  
586 three times for  $15\text{ min}$  before mounting in Vectorshield Antifade Mounting Medium  
587 (Vector Labs). Whole cross-sections of TA muscles were produced via montaged  $40\times$   
588 magnification tile scans (Zeiss Axio Z1 Widefield system). Morphometric analysis was  
589 performed using Fiji open source software as previously described (26461208).  
590 Simultaneous DAPI nuclear stain was used for central nucleation count. PAX7 counts  
591 were performed manually in a blinded fashion, a satellite cell was defined as having a  
592 PAX7 positive nuclei within a LAMININ cell border staining. For immunostaining the  
593 following antibodies were used anti-PAX7 PAX7 (DSHB, PAX7,  $1:50$ ), after pre-  
594 treatment with Vector Labs Mouse on Mouse Blocking Reagent (MKB-2213) according  
595 to manufacturer's instructions and anti-LAMININ (Abcam, ab11576,  $1:1000$ ).



596 **Figure Legends**

597

598 **Figure 1: Autophagy inhibition decreases lifespan.**

599 **a-c**, LT-Atg5i mice on dox continuously from two months old display a reduced lifespan  
600 in comparison to LT-Control as shown in survival graphs for **(a)** combined ( $p < 0.0001$ ),  
601 **(b)** male ( $p < 0.0001$ ), **(c)** female ( $p < 0.0001$ ) (Mantel-Cox test). Median survival (days  
602 on dox) and mice per group are indicated. **d-e**, During this period LT-Atg5i mice also  
603 display a reduced weight gain in both **(d)** male and **(e)** female cohorts. **f**, LT-Atg5i mice  
604 also display an increased frequency of skin inflammation and eye infections in  
605 comparison to age-matched LT-Control mice. **g**, Cardiac fibrosis was also evident in  
606 LT-Atg5i mice. Representative images of H&E and Massons Trichrome are shown.  
607 Scale bars, 100  $\mu\text{m}$ . **h**, Age-matched skinned mice. LT-Atg5i mice show kyphosis  
608 (yellow dotted line traces the arch of the spine). They often displayed premature  
609 greying (dotted rectangle). Arrows indicate the presence of inflammation.

610

611 **Figure 2: LT-Atg5i mice present with accelerated aging phenotypes.**

612 **a**, Extramedullary haematopoiesis is present in the spleens of LT-Atg5i mice in  
613 comparison to age-matched controls. Scale bars, 100  $\mu\text{m}$ . **b**, Composition of the  
614 peripheral immune system in LT-Atg5i mice is reminiscent of old control mice. ( $n = 5-6$   
615 mice per group). **c**, Six-month-old LT-Atg5i mice (four months dox treatment) displayed  
616 increased serum levels of IL-6 and TNF (LT-Atg5i  $n = 5$ , LT-Ctrl  $n = 8$ ; Mann Whitney  
617 Test). **d-h**, LT-Atg5i mice display alterations in skeletal muscle after six-months of dox  
618 treatment. **(d)** LT-Atg5i mice display a significant difference in minimum feret size ( $n =$   
619 4 R-Ctrl and 4 R-Atg5i, Mann Whitney test) and **(e)** cross-sectional area ( $n = 4$  R-Ctrl  
620 and 4 R-Atg5i, Mann Whitney test). LT-Atg5i mice also display a decrease in Pax7  
621 nuclear positivity per fibre **(f)**, an increase in central nucleation **(g)**, and positivity for  
622 the mitochondrial marker TOM20 **(h)**, as determined by tissue immunofluorescence

623 (unpaired two-tailed Welches t-test; n= 4 R-Ctrl and 4 R-Atg5i). Error bars indicate  
624 standard deviations. \*p<0.05; \*\*p<0.01, \*\*\*p<0.001

625

### 626 **Figure 3: Autophagy inhibition drives senescence in vivo**

627 **a-d**, Markers of senescence can also be seen across multiple tissues in our LT-Atg5i  
628 cohorts treated with dox for four months including in (a) kidney, (b) heart, and (c) liver.

629 (d) LT-Atg5i livers stain positively for senescence associated  $\beta$ -galactosidase and p21  
630 unlike age-matched control mice (scale bar, 25  $\mu$ m). e, Six-month doxycycline treated

631 LT-Atg5i livers display an increase in the frequency and abundance of  $\gamma$ -H2AX at  
632 telomeres, a marker associated with increasing chronological age (unpaired two-tailed

633 t-test; n=5). f, A representative example image shown. Arrowheads point to TAF that  
634 are magnified on the right of the image. Scale bar, 10  $\mu$ m. Error bars indicate standard

635 deviation \*\*\*p<0.001

636

### 637 **Figure 4: Restoration of autophagy partially restores health-span**

638 **a**, Schematic of R-Atg5i study. Briefly two-month old mice are given dox to induce Atg5  
639 downregulation for four months at which point they exhibit ageing-like phenotypes. Dox

640 is then removed and autophagy restored. **b**, Tissues from R-Atg5i mice with autophagy  
641 restored for two months display evidence of ATG5 protein and autophagy restoration,

642 yet still stain positively for markers of senescence. **c**, Atg5i mice on dox for four months  
643 and six months display increase frailty scores in comparison to controls (ARU, arbitrary

644 units). While R-Atg5i mice where autophagy has been restored for four months, display  
645 a recovery (Two-way ANOVA with Tukey's correction for all comparisons, n=3-16). **d**,

646 Whole blood cell counts from R-Atg5i mice display no difference in comparison to age  
647 matched R-Control mice (unpaired two-tailed t-test; n=11 per group). **e**, Inflammatory

648 serum cytokines IL6 and TNF are equivalent in R-Atg5i and R-Control mice two-  
649 months post dox removal (Mann Whitney test; n= 3 R-Ctrl and 4 R-Atg5i). **f**, Red blood

650 cell distribution width (RDW) is altered in aged autophagy-restored cohorts (four

651 months dox, eight months restoration) (unpaired two-tailed t-test; n=14 per group).  
652 Error bars indicate standard deviation; NS denotes not significant. \*p<0.05; \*\*p<0.01,  
653 \*\*\*p<0.001.

654

### 655 **Figure 5: Restoration of autophagy does not reverse markers of aging**

656 **a**, p62/Sqstm1 staining of R-Atg5i liver highlights the incomplete removal of  
657 aggregates four months after autophagy restoration. Scale bars, 100  $\mu$ m. **b**, The same  
658 livers have a higher incidence of age associated pigmentation in comparison to age-  
659 matched control mice. (yellow arrow). **c**, TAF frequency and abundance also remains  
660 elevated in R-Atg5i mice (unpaired two-tailed t-test; n= 4 R-Ctrl and 3 R-Atg5i). **d-h**,  
661 Skeletal muscle analysis from four months dox treated and two months restored R-  
662 Atg5i mice. R-Atg5i muscle fibres continue to display significant alterations in (**d**)  
663 minimum feret size (n= 4 R-Ctrl and 3 R-Atg5i, Mann Whitney test) and (**e**) cross-  
664 sectional area (n= 4 R-Ctrl and 3 R-Atg5i, Mann Whitney test), but with a recovery of  
665 (**f**) central nucleation. (**g**) Pax7 nuclear positivity per fibre and (**h**) positivity for the  
666 mitochondrial marker TOM20 displays a heterogeneous recovery pattern in these  
667 mice, as measured by tissue immunofluorescence. (**f-h**, unpaired two-tailed Welch's  
668 t-test; n= 2 R-Ctrl and 4 R-Atg5i). Error bars indicate standard deviations. \*p<0.05;  
669 \*\*p<0.01, \*\*\*p<0.001

670

### 671 **Figure 6: R-Atg5i mice are associated with accelerated spontaneous tumor** 672 **development**

673 **a**, R-Atg5i mice on display a reduced lifespan in comparison to R-Control mice  
674 (p<0.01). **b**, Increased frequency of spontaneous tumour formation in R-Atg5i cohorts  
675 (p<0.001). **c**, Tumor spectrum in R-Atg5i mice versus R-Control mice. **d - e**,  
676 Examples of R-Atg5i tumour histology. H&E staining and immunostaining of indicated  
677 proteins. Scale bars, 100 $\mu$ m.

678

679 **Supplementary Figure 1: Characterisation of LT-Atg5i mice**

680 **a**, LT-Atg5i mice display no life-span associated sex bias (Red, LT-Atg5i Males; Purple,  
681 LT-Atg5i Females;  $p=0.8$ ). **b**, LT-Atg5i mouse weight plateau while LT-Control mice  
682 continue to gain weight over their lifetime. **c**, Example of mouse suffering from  
683 ulcerative dermatitis. **d**, Splenic weights were increased in LT-Atg5i mice in  
684 comparison to age matched LT-Control mice. **e**, LT-Atg5i mice also display an increase  
685 in liver weight. **f-h**, liver function of LT-Atg5i mice as determined using serum samples.  
686 LT-Atg5i mice on dox for 4 months display **(f)** an increase in serum ALT and **(g)** a  
687 decrease in serum albumin that is further exacerbated in a subset of LT-Atg5i EoL  
688 individuals (yellow circles). **(h)** The only sample tested that displayed an increase in  
689 serum bilirubin levels was also from a mouse displaying high levels of serum ALT and  
690 low levels of serum albumin. Error bars indicate standard deviations. \* $p<0.05$ ; \*\* $p<0.01$ ,  
691 \*\*\* $p<0.001$

692

693 **Supplementary Figure 2: Kidney alterations in LT-Atg5i mice**

694 **(a)** LT-cohorts treated with doxycycline for 6 months mice display no significant  
695 differences in serum creatinine levels (unpaired two-tailed Welches t-test, NS denotes  
696 not significant;  $n= 3$  LT-Control and 4 LT-Atg5i). At death only a subset of LT-Atg5i  
697 mice display an increase in serum creatinine levels. **b-f**, LT-Atg5i mouse kidneys  
698 treated with doxycycline for 6 months present with **(b)** evidence of sclerotic glomeruli  
699 determined using PAS stain that are also **(c-d)** enlarged and hypercellular in  
700 comparison to LT-Control ( $p=0.0479$ , unpaired two-tailed t-test;  $n= 4$  LT-Control and 3  
701 LT-Atg5i, the cross-sectional area of 10 randomly chosen glomeruli were measured  
702 per mouse). **(e)** Congo red and **(f)** P62/Sqstm1 staining of LT-Atg5i mouse kidneys  
703 treated with doxycycline for 6 months highlights an increase in protein aggregation not  
704 present in age-matched LT-Control mice. **g**, Cardiac tissue from LT-Atg5i mice at death  
705 was significantly heavier than age-matched LT-Control mice. ( $p=0.0108$ ). Error bars  
706 indicate standard deviations. \* $p<0.05$ ; \*\* $p<0.01$ , \*\*\* $p<0.001$

707

708 **Supplementary Figure 3: Systemic alterations in LT-Atg5i mice**

709 **a**, LT-Atg5i mice display evidence of widespread immune infiltration across multiple  
710 tissues in comparison to age-matched controls. Scale bars, 100  $\mu$ m. **b**, White blood cell  
711 counts (WBC) of LT-Control and LT-Atg5i mice treated with doxycycline for 4 months  
712 (6 months old) (unpaired two-tailed Welch's t-test, n=5-6 per group). **c**, Skeletal  
713 muscle displays markers of senescence in LT-Atg5i cohorts on doxycycline for 4  
714 months. \*\*p<0.01

715

716 **Supplementary Figure 4: Hypomorphic LT-Atg5i\_2 mice also display aging**

717 **phenotypes**

718 **a-c**, LT-Atg5i\_2 mice phenotypically recapitulate premature ageing phenotypes  
719 including **(a)** kyphosis, **(b)** increased frailty (ARU, arbitrary units; Mann-whitney n= 14  
720 LT-Control and 5 LT-Atg5i\_2 mice), and **(c)** reduced longevity. **d-f** However, Atg5i\_2  
721 mice appear to have a hypomorphic phenotype and do not recapitulate the phenotypes  
722 found in Atg5 knock-out and LT-Atg5i. These include no evidence of **(d)** hepatomegaly  
723 or **(e)** splenomegaly. **(f)** Correspondingly, p62/SQSTM1 and LC3 levels do not  
724 accumulate to the same degree in LT-Atg5\_2 mice treated with doxycycline for 6  
725 weeks. Scale bars, 100  $\mu$ m. Error bars indicate standard deviations. \*p<0.05

726

727 **Supplementary Figure 5: Autophagy restoration reverses hepatomegaly and**

728 **splenomegaly**

729 **a**, Splenic and **b**, liver weights from R-Atg5i mice exhibit evidence of recovery. **c**, In  
730 addition R-Atg5i mice display a reduction in serum ALT levels (unpaired two-tailed  
731 Welch's t-test; n= 3-4 per cohort). **d-f**, R-Atg5i mice 4 months post dox removal display  
732 evidence of recovery in the kidneys as determined by **(d-e)** normalisation of glomeruli  
733 size appeared relative to age-matched controls (unpaired two-tailed Mann whitney,  
734 n=3-4 mice per group) and **(f)** the absence of sclerosis. **g**, A partial recovery in serum

735 albumin levels is also present in these mice unpaired two-tailed Welches t-test; n= 2-  
736 9 per cohort). Error bars indicate standard deviations. \*p<0.05; \*\*p<0.01, \*\*\*p<0.001

737

738 **Supplementary Figure 6: Autophagy restoration displays segmental rescue of**  
739 **tissue phenotypes**

740 **a-b**, Skeletal muscle displays no rescue of phenotype once Atg5i mice are removed  
741 from dox. As determined by **(a)** minimal feret size, and **(b)** cross-sectional area.  
742 (unpaired two-tailed Welches t-test, n=3-5 per group). **c**, Cardiac fibrosis was still  
743 present in R-Atg5i mice 4 months post dox removal. Error bars indicate standard  
744 deviations. \*p<0.05

745

746 **Supplementary Movie. 1:** R-Atg5i mice 4 months post dox removal highlighting the  
747 stochastic response to autophagy restoration. All mice were treated on dox for 4  
748 months before dox removal for 2 months. At this stage, 100 % of mice show kyphosis.  
749 The movie represents three examples with different levels of recovery. Mouse I exhibits  
750 little recovery, whereas mouse III looks normal with no sign of kyphosis. Mouse II  
751 appears active but with mild kyphosis.

## Figure 1 \_ Cassidy

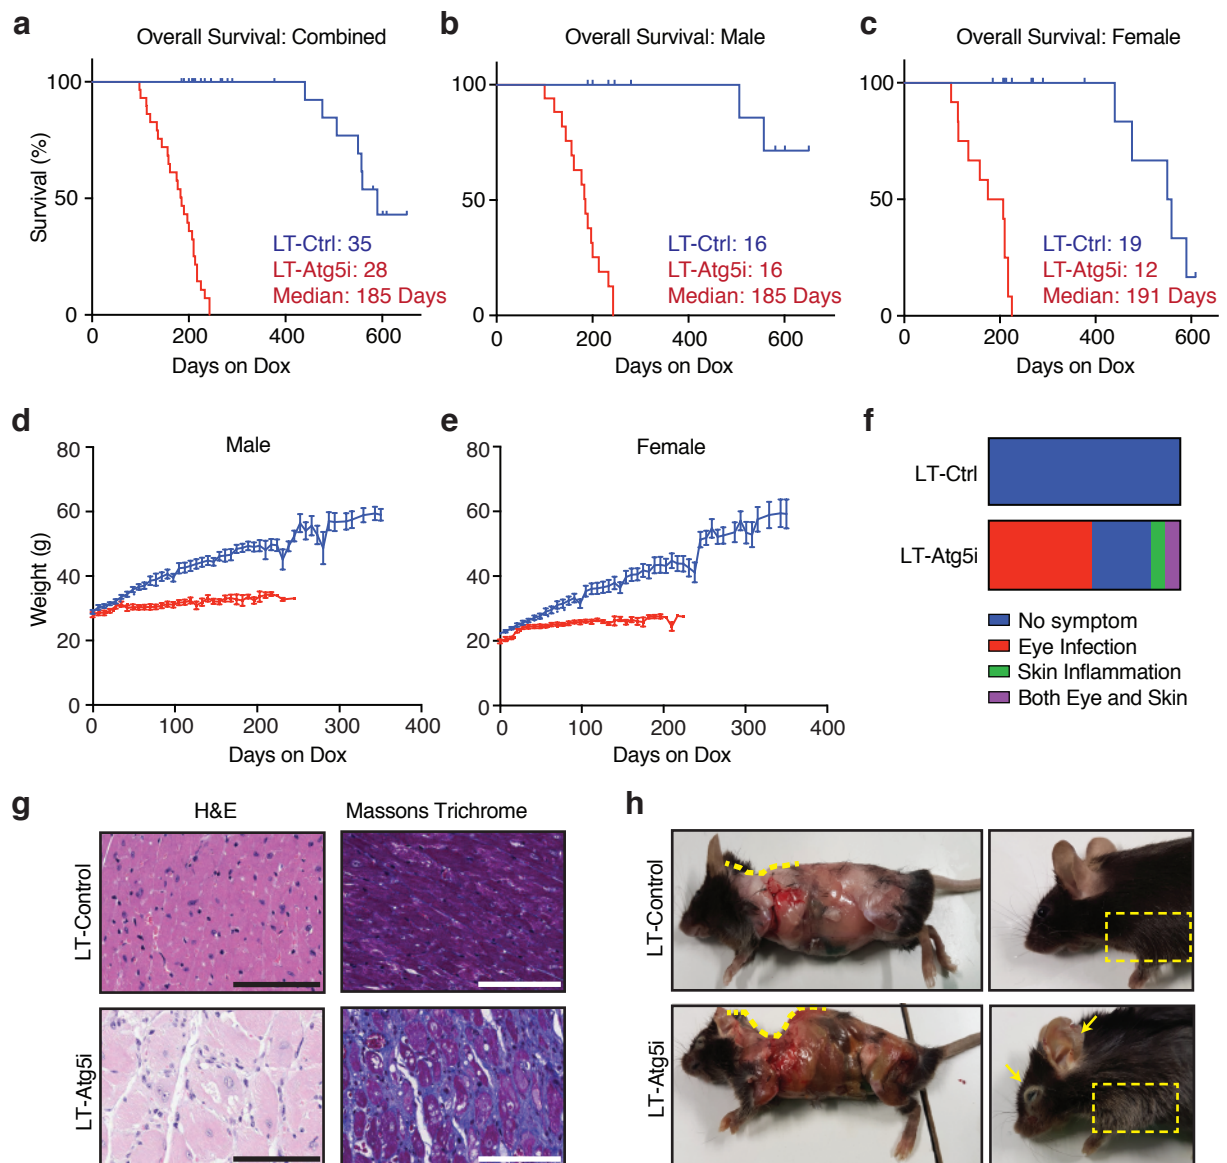

### Figure 1: Autophagy inhibition decreases lifespan.

**a-c**, LT-Atg5i mice on dox continuously from two months old display a reduced lifespan in comparison to LT-Control as shown in survival graphs for **(a)** combined ( $p < 0.0001$ ), **(b)** male ( $p < 0.0001$ ), **(c)** female ( $p < 0.0001$ ) (Mantel-Cox test). Median survival (days on dox) and mice per group are indicated. **d-e**, During this period LT-Atg5i mice also display a reduced weight gain in both **(d)** male and **(e)** female cohorts. **f**, LT-Atg5i mice also display an increased frequency of skin inflammation and eye infections in comparison to age-matched LT-Control mice. **g**, Cardiac fibrosis was also evident in LT-Atg5i mice. Representative images of H&E and Massons Trichrome are shown. Scale bars, 100  $\mu\text{m}$ . **h**, Age-matched skinned mice. LT-Atg5i mice show kyphosis (yellow dotted line traces the arch of the spine). They often displayed premature greying (dotted rectangle). Arrows indicate the presence of inflammation.

## Figure 2 \_ Cassidy

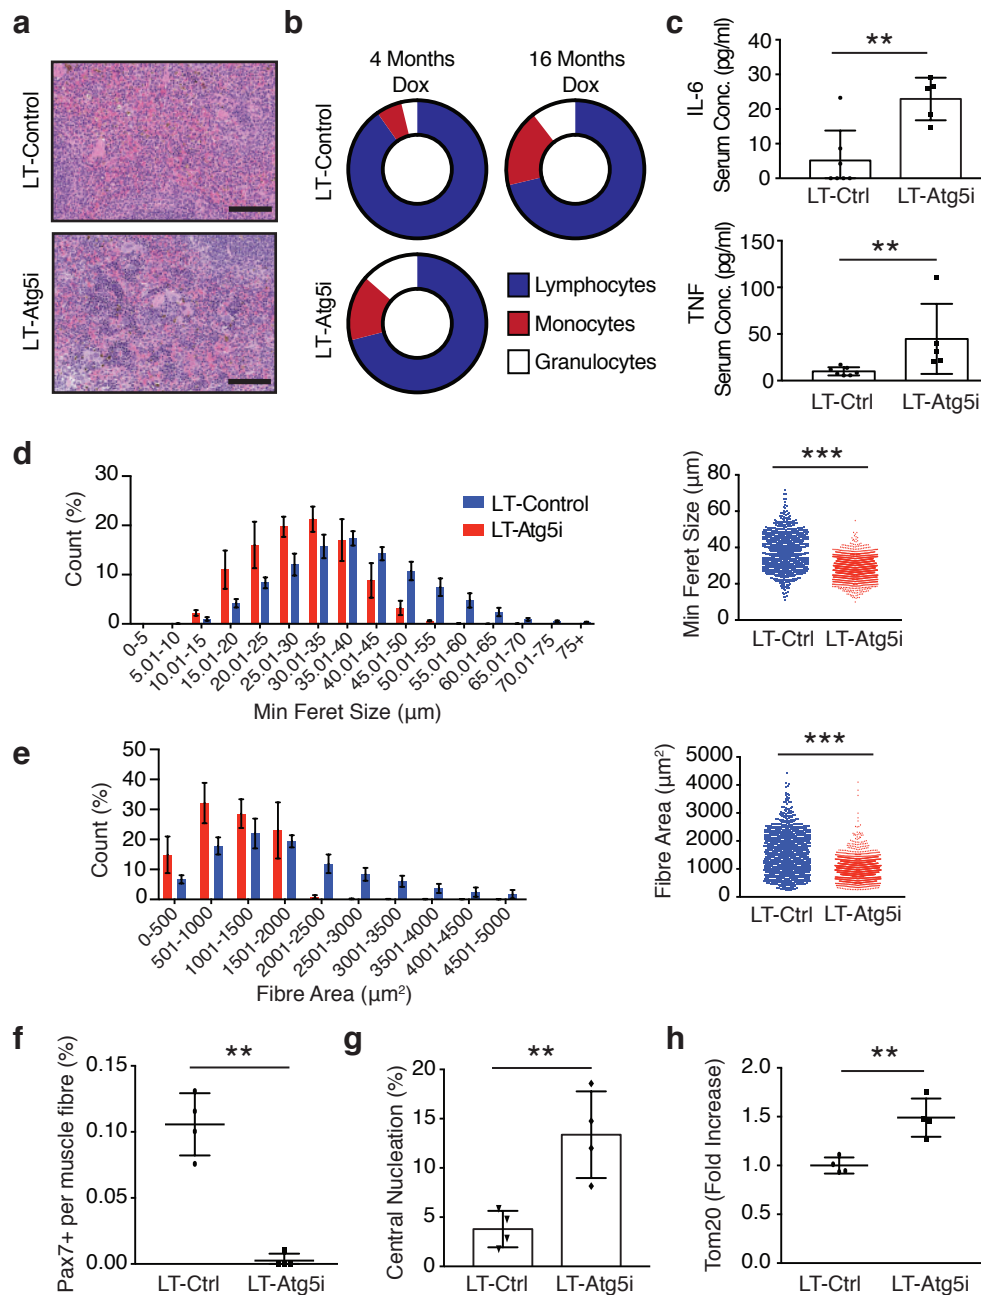

### Figure 2: LT-Atg5i mice present with accelerated aging phenotypes.

**a**, Extramedullary haematopoiesis is present in the spleens of LT-Atg5i mice in comparison to age-matched controls. Scale bars, 100  $\mu\text{m}$ . **b**, Composition of the peripheral immune system in LT-Atg5i mice is reminiscent of old control mice. (n=5-6 mice per group). **c**, Six-month-old LT-Atg5i mice (four months dox treatment) displayed increased serum levels of IL-6 and TNF (LT-Atg5i n=5, LT-Ctrl n=8; Mann Whitney Test). **d-h**, LT-Atg5i mice display alterations in skeletal muscle after six-months of dox treatment. **(d)** LT-Atg5i mice display a significant difference in minimum feret size (n= 4 R-Ctrl and 4 R-Atg5i, Mann Whitney test) and **(e)** cross-sectional area (n= 4 R-Ctrl and 4 R-Atg5i, Mann Whitney test). LT-Atg5i mice also display a decrease in Pax7 nuclear positivity per fibre **(f)**, an increase in central nucleation **(g)**, and positivity for the mitochondrial marker TOM20 **(h)**, as determined by tissue immunofluorescence (unpaired two-tailed Welch's t-test; n= 4 R-Ctrl and 4 R-Atg5i). Error bars indicate standard deviations. \*p<0.05; \*\*p<0.01, \*\*\*p<0.001



## Figure 3 \_ Cassidy

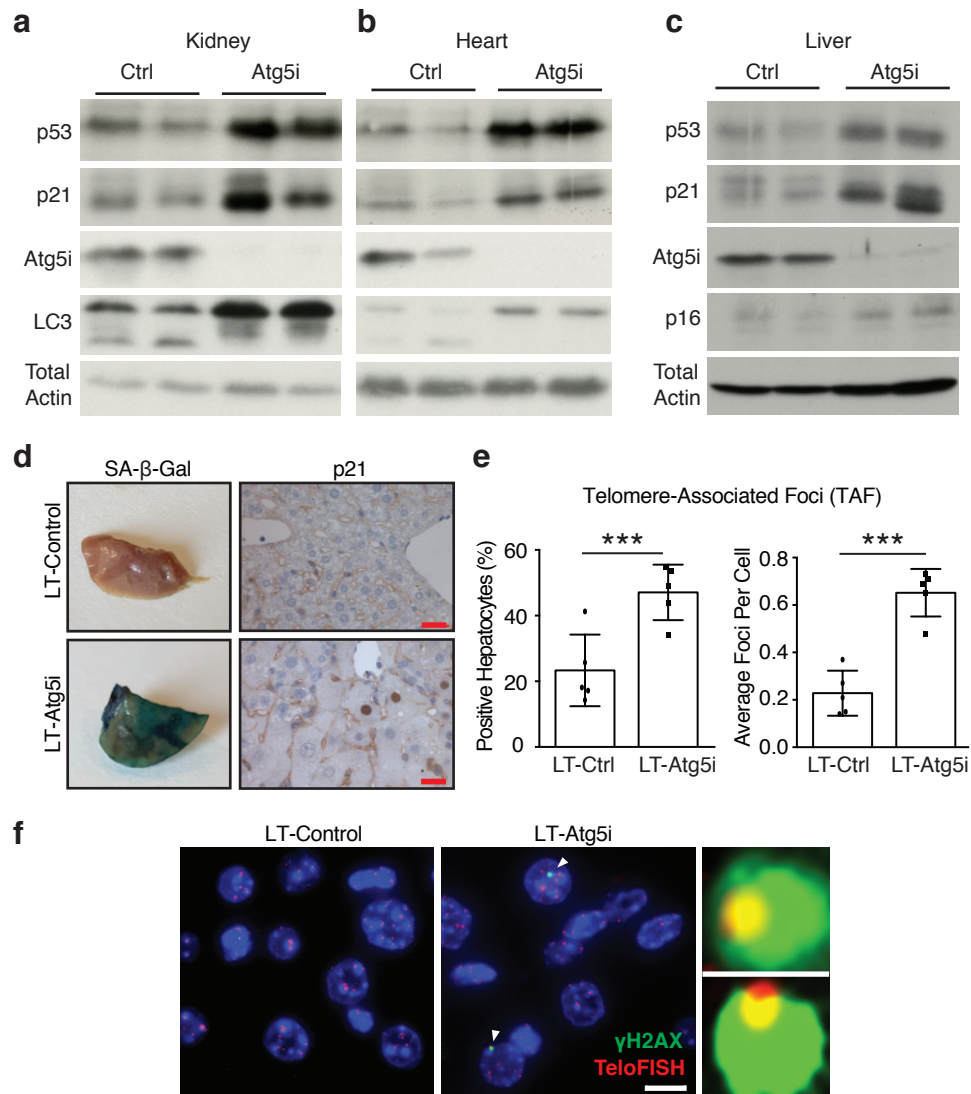

### Figure 3: Autophagy inhibition drives senescence *in vivo*

**a-d**, Markers of senescence can also be seen across multiple tissues in our LT-Atg5i cohorts treated with dox for four months including in **(a)** kidney, **(b)** heart, and **(c)** liver. **(d)** LT-Atg5i livers stain positively for senescence associated β-galactosidase and p21 unlike age-matched control mice (scale bar, 25 μm). **e**, Six-month doxycycline treated LT-Atg5i livers display an increase in the frequency and abundance of γ-H2AX at telomeres, a marker associated with increasing chronological age (unpaired two-tailed t-test; n=5). **f**, A representative example image shown. Arrowheads point to TAF that are magnified on the right of the image. Scale bar, 10 μm. Error bars indicate standard deviation \*\*\*p<0.001

## Figure 4 \_ Cassidy

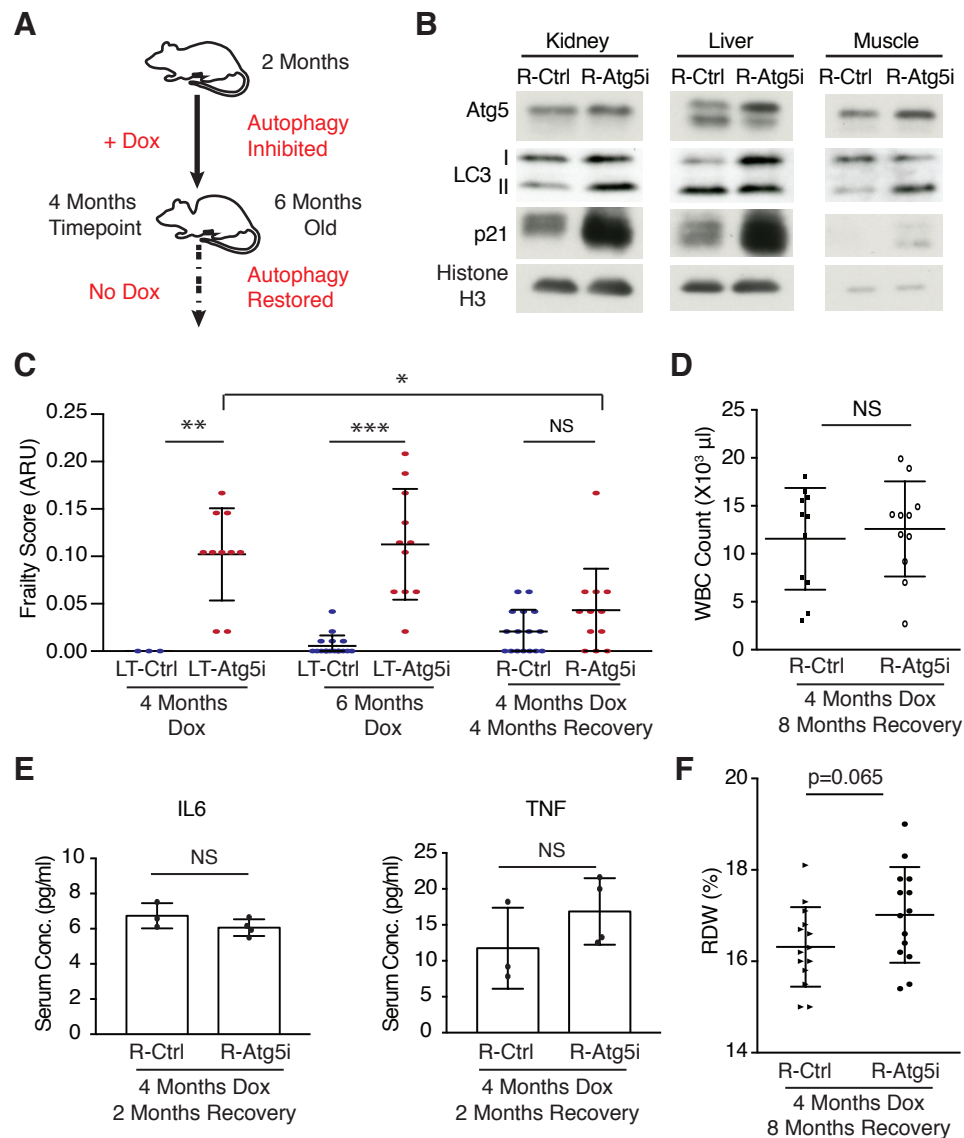

### Figure 4: Restoration of autophagy partially restores health-span

**a**, Schematic of R-Atg5i study. Briefly two-month old mice are given dox to induce Atg5 down-regulation for four months at which point they exhibit ageing-like phenotypes. Dox is then removed and autophagy restored. **b**, Tissues from R-Atg5i mice with autophagy restored for two months display evidence of ATG5 protein and autophagy restoration, yet still stain positively for markers of senescence. **c**, Atg5i mice on dox for four months and six months display increase frailty scores in comparison to controls (ARU, arbitrary units). While R-Atg5i mice where autophagy has been restored for four months, display a recovery (Two-way ANOVA with Tukey's correction for all comparisons, n=3-16). **d**, Whole blood cell counts from R-Atg5i mice display no difference in comparison to age matched R-Control mice (unpaired two-tailed t-test; n=11 per group). **e**, Inflammatory serum cytokines IL6 and TNF are equivalent in R-Atg5i and R-Control mice two-months post dox removal (Mann Whitney test; n= 3 R-Ctrl and 4 R-Atg5i). **f**, Red blood cell distribution width (RDW) is altered in aged autophagy-restored cohorts (four months dox, eight months restoration) (unpaired two-tailed t-test; n=14 per group). Error bars indicate standard deviation; NS denotes not significant. \*p<0.05; \*\*p<0.01, \*\*\*p<0.001.

## Figure 5 \_ Cassidy

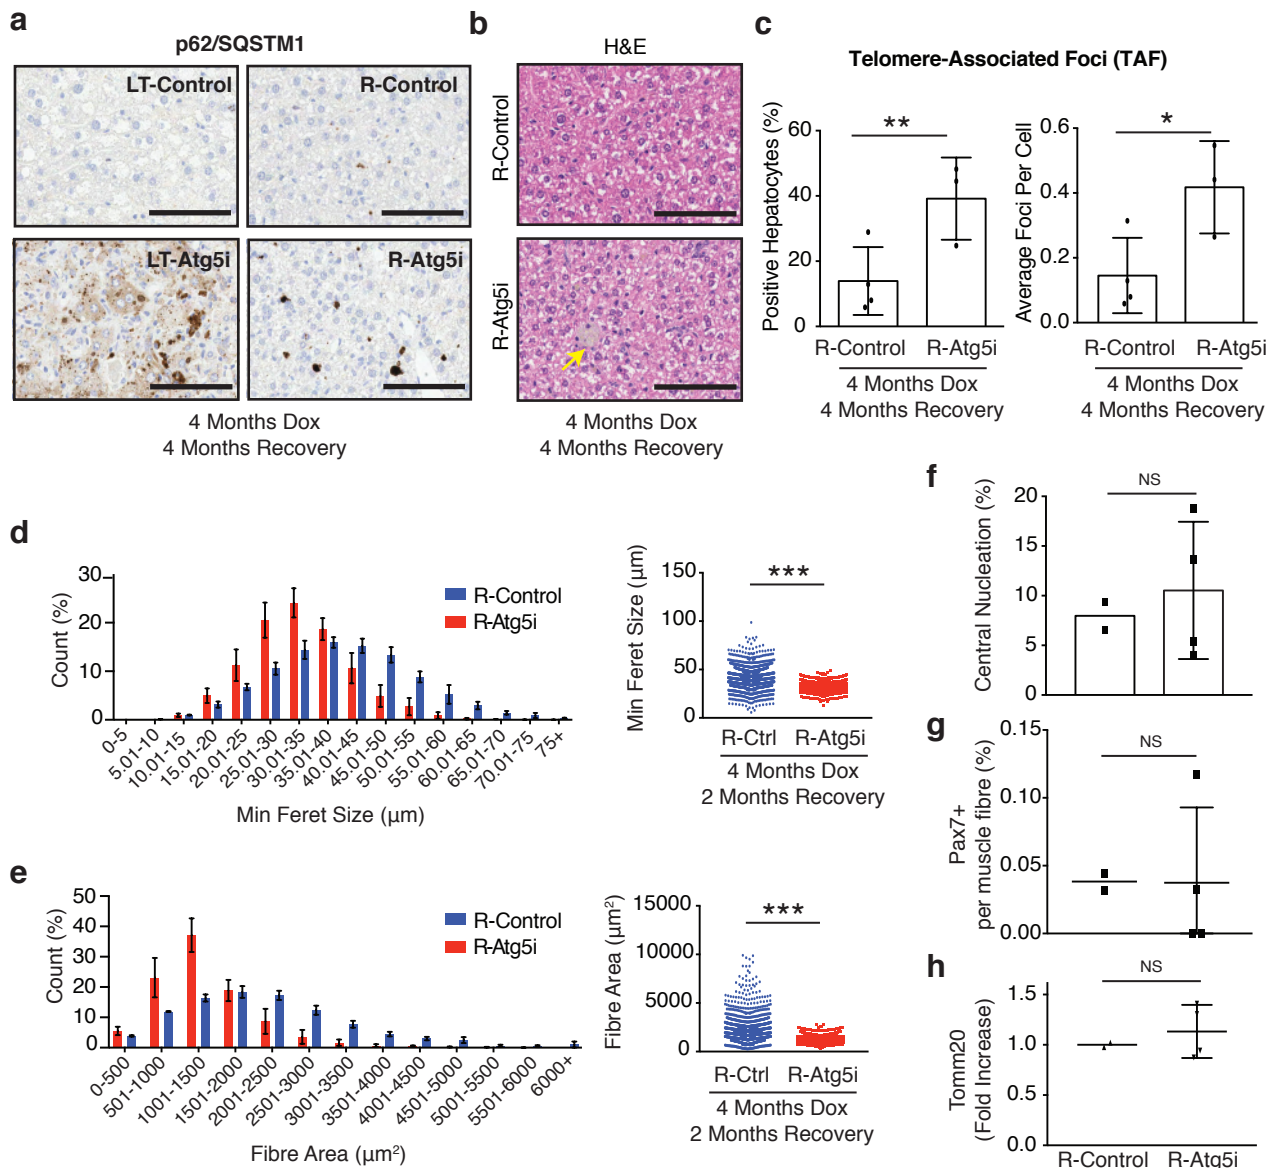

### Figure 5: Restoration of autophagy does not reverse markers of ageing

**a**, p62/Sqstm1 staining of R-Atg5i liver highlights the incomplete removal of aggregates four months after autophagy restoration. Scale bars, 100  $\mu$ m. **b**, The same livers have a higher incidence of age associated pigmentation in comparison to age-matched control mice. (yellow arrow). **c**, TAF frequency and abundance also remains elevated in R-Atg5i mice (unpaired two-tailed t-test; n= 4 R-Ctrl and 3 R-Atg5i). **d-h**, Skeletal muscle analysis from four months dox treated and two months restored R-Atg5i mice. R-Atg5i muscle fibres continue to display significant alterations in **(d)** minimum feret size (n= 4 R-Ctrl and 3 R-Atg5i, Mann Whitney test) and **(e)** cross-sectional area (n= 4 R-Ctrl and 3 R-Atg5i, Mann Whitney test), but with a recovery of **(f)** central nucleation. **(g)** Pax7 nuclear positivity per fibre and **(h)** positivity for the mitochondrial marker TOM20 displays a heterogeneous recovery pattern in these mice, as measured by tissue immunofluorescence. **(f-h)**, unpaired two-tailed Welch's t-test; n= 2 R-Ctrl and 4 R-Atg5i). Error bars indicate standard deviations. \*p<0.05; \*\*p<0.01, \*\*\*p<0.001

## Figure 6 \_ Cassidy

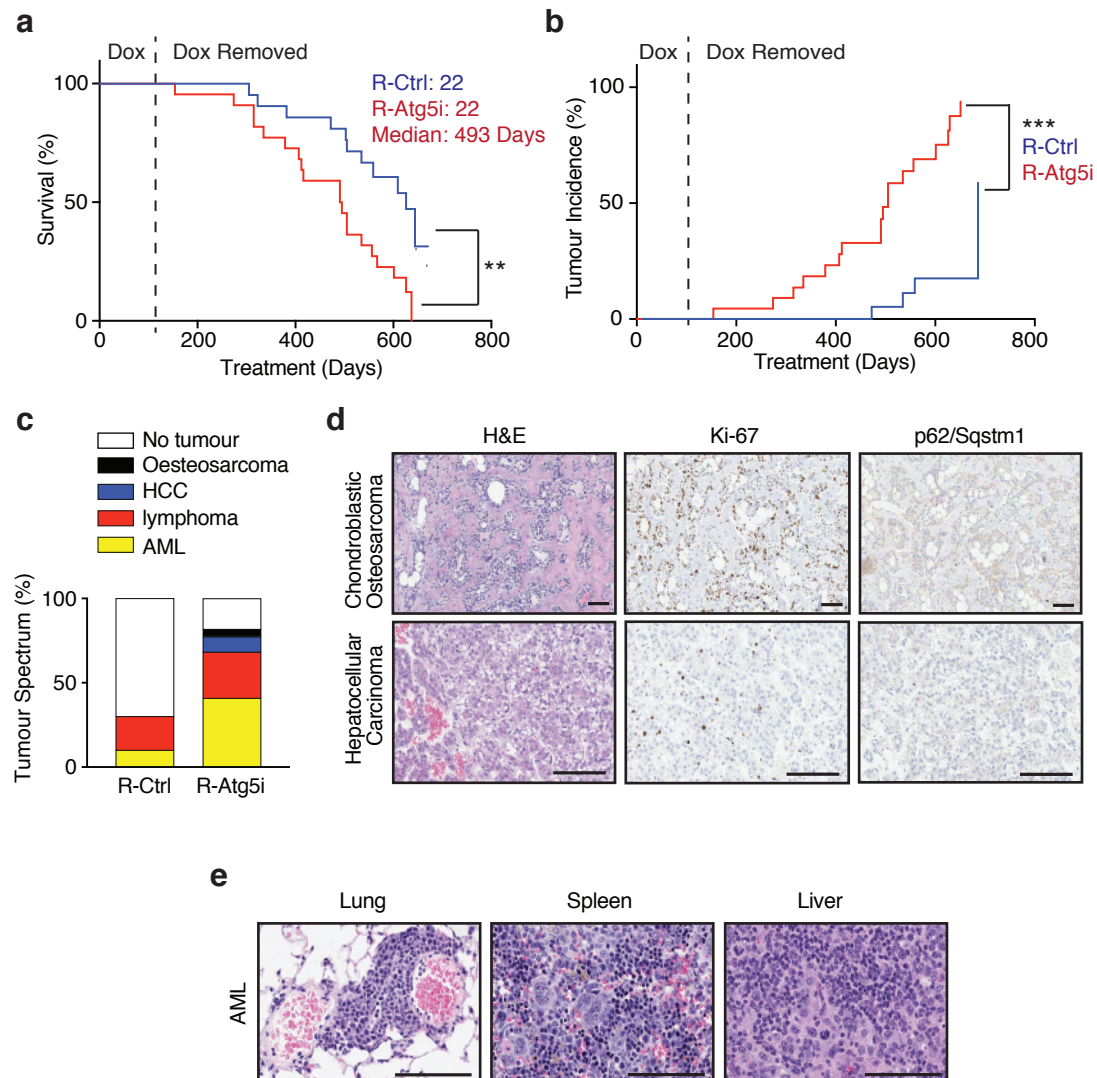

### Figure 6: R-Atg5i mice are associated with accelerated spontaneous tumor development

**a**, R-Atg5i mice on display a reduced lifespan in comparison to R-Control mice ( $p < 0.01$ ). **b**, Increased frequency of spontaneous tumour formation in R-Atg5i cohorts ( $p < 0.001$ ). **c**, Tumor spectrum in R-Atg5i mice versus R-Control mice. **d - e**, Examples of R-Atg5i tumour histology. H&E staining and immunostaining of indicated proteins. Scale bars, 100 $\mu$ m.

## Supplementary Figure 1 \_ Cassidy

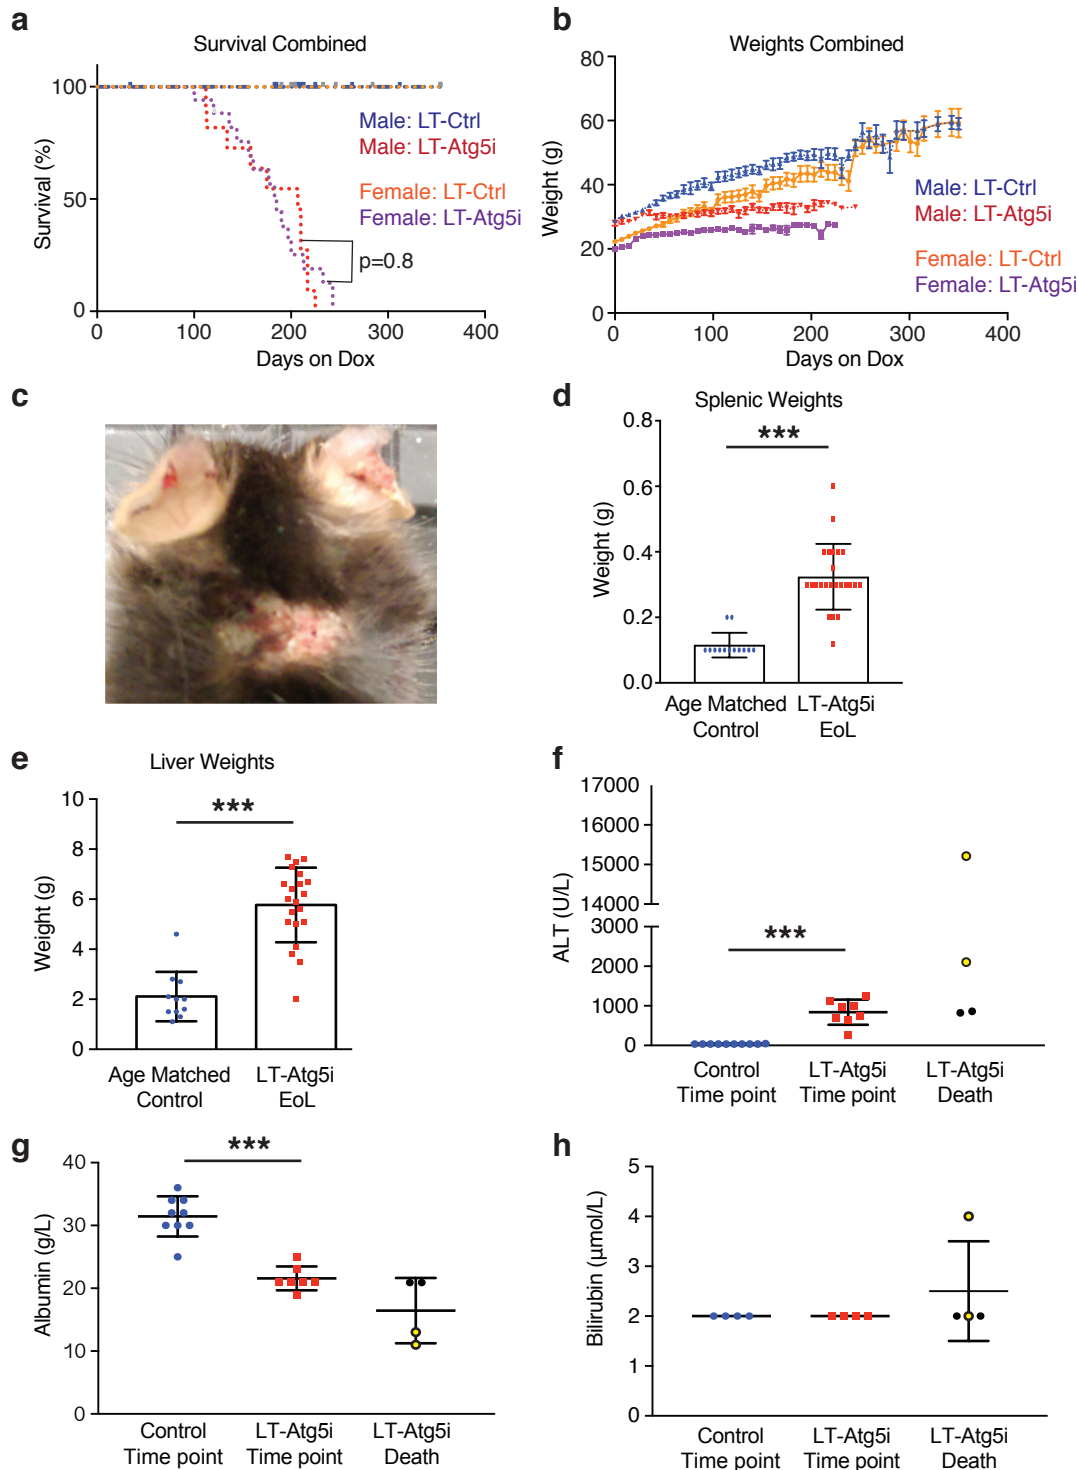

### Supplementary Figure 1: Characterisation of LT-Atg5i mice

**a**, LT-Atg5i mice display no life-span associated sex bias (Red, LT-Atg5i Males; Purple, LT-Atg5i Females; p=0.8). **b**, LT-Atg5i mouse weight plateau while LT-Control mice continue to gain weight over their lifetime. **c**, Example of mouse suffering from ulcerative dermatitis. **d**, Splenic weights were increased in LT-Atg5i mice in comparison to age matched LT-Control mice. **e**, LT-Atg5i mice also display an increase in liver weight. **f-h**, liver function of LT-Atg5i mice as determined using serum samples. LT-Atg5i mice on dox for 4 months display **(f)** an increase in serum ALT and **(g)** a decrease in serum albumin that is further exacerbated in a subset of LT-Atg5i EoL individuals (yellow circles). **(h)** The only sample tested that displayed an increase in serum bilirubin levels was also from a mouse displaying high levels of serum ALT and low levels of serum album. Error bars indicate standard deviations. \*p<0.05; \*\*p<0.01, \*\*\*p<0.001

## Supplementary Figure 2\_ Cassidy

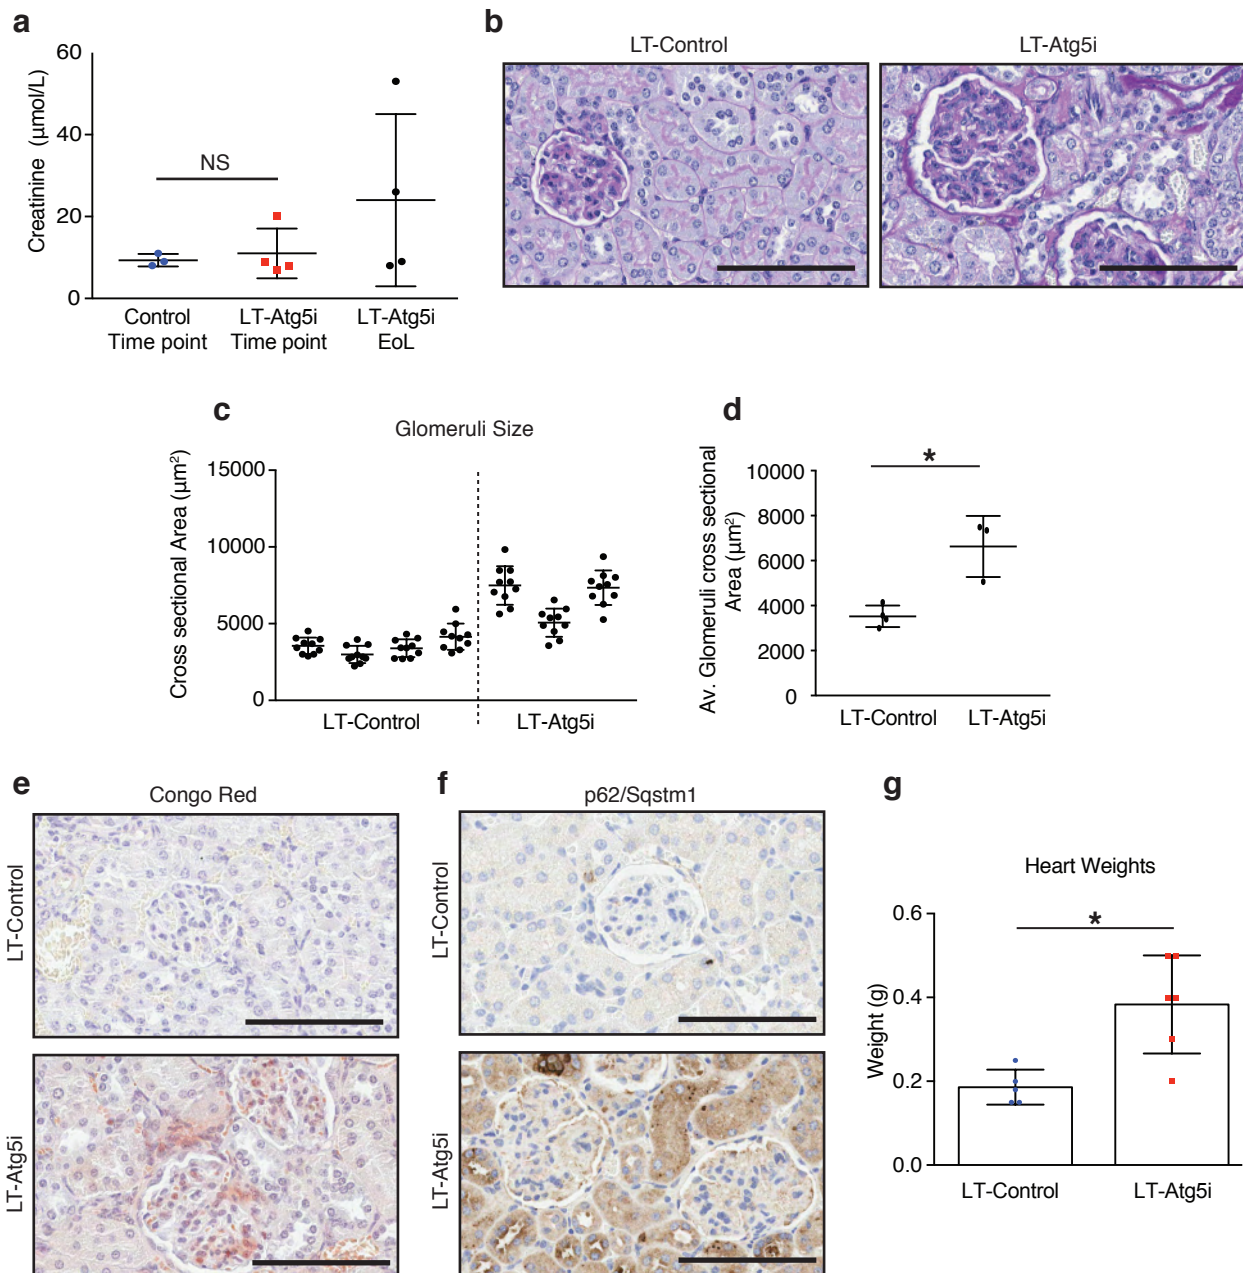

### Supplementary Figure 2: Kidney alterations in LT-Atg5i mice

(a) LT-cohorts treated with doxycycline for 6 months mice display no significant differences in serum creatinine levels (unpaired two-tailed Welch's t-test, NS denotes not significant;  $n=3$  LT-Control and 4 LT-Atg5i). At death only a subset of LT-Atg5i mice display an increase in serum creatinine levels. **b-f**, LT-Atg5i mouse kidneys treated with doxycycline for 6 months present with (b) evidence of sclerotic glomeruli determined using PAS stain that are also (c-d) enlarged and hypercellular in comparison to LT-Control ( $p=0.0479$ , unpaired two-tailed t-test;  $n=4$  LT-Control and 3 LT-Atg5i, the cross-sectional area of 10 randomly chosen glomeruli were measured per mouse). (e) Congo red and (f) P62/Sqstm1 staining of LT-Atg5i mouse kidneys treated with doxycycline for 6 months highlights an increase in protein aggregation not present in age-matched LT-Control mice. **g**, Cardiac tissue from LT-Atg5i mice at death was significantly heavier than age-matched LT-Control mice. ( $p=0.0108$ ). Error bars indicate standard deviations. \* $p<0.05$ ; \*\* $p<0.01$ , \*\*\* $p<0.001$

## Supplementary Figure 3\_ Cassidy

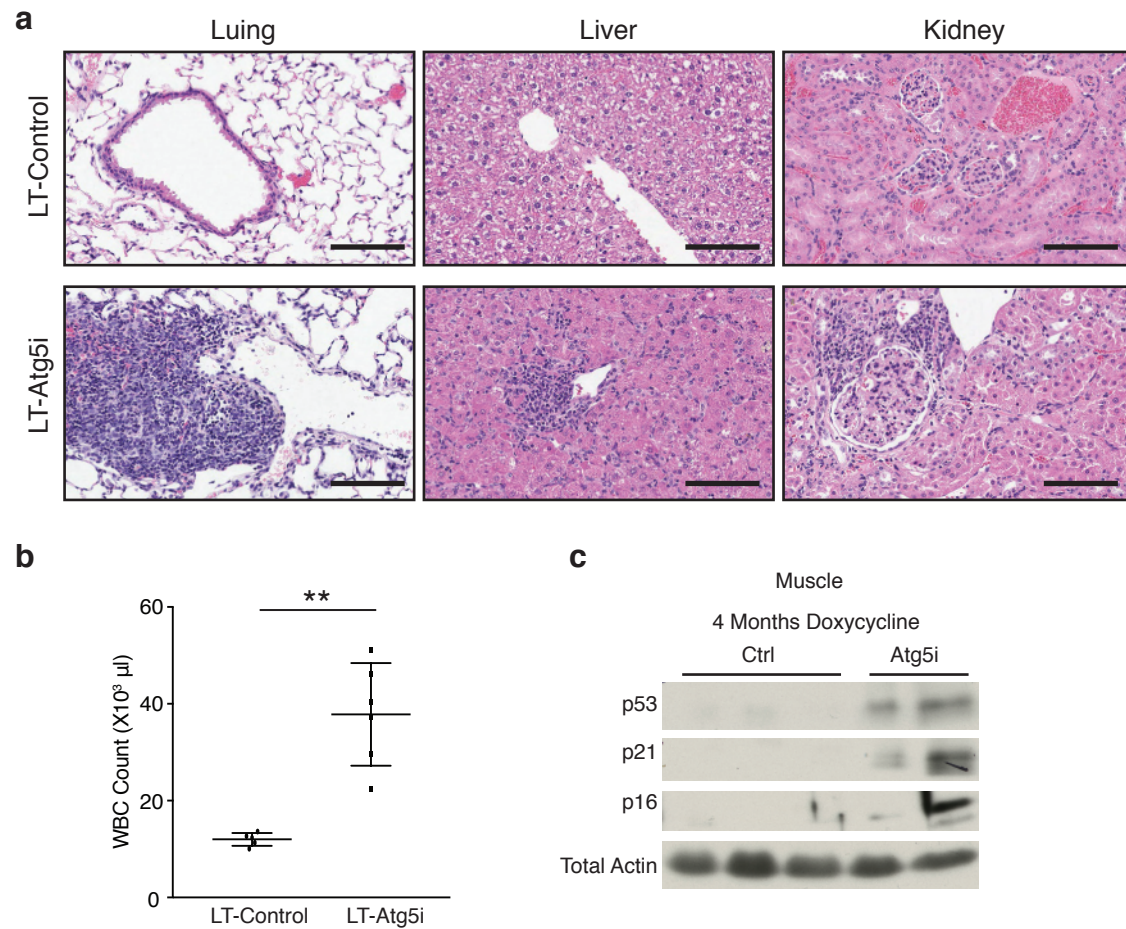

### Supplementary Figure 3: Systemic alterations in LT-Atg5i mice

**a**, LT-Atg5i mice display evidence of widespread immune infiltration across multiple tissues in comparison to age-matched controls. Scale bars, 100 µm. **b**, White blood cell counts (WBC) of LT-Control and LT-Atg5i mice treated with doxycycline for 4 months (6 months old) (unpaired two-tailed Welch's t-test, n=5-6 per group). **c**, Skeletal muscle displays markers of senescence in LT-Atg5i cohorts on doxycycline for 4 months. \*\*p<0.01

## Supplementary Figure 4 \_ Cassidy

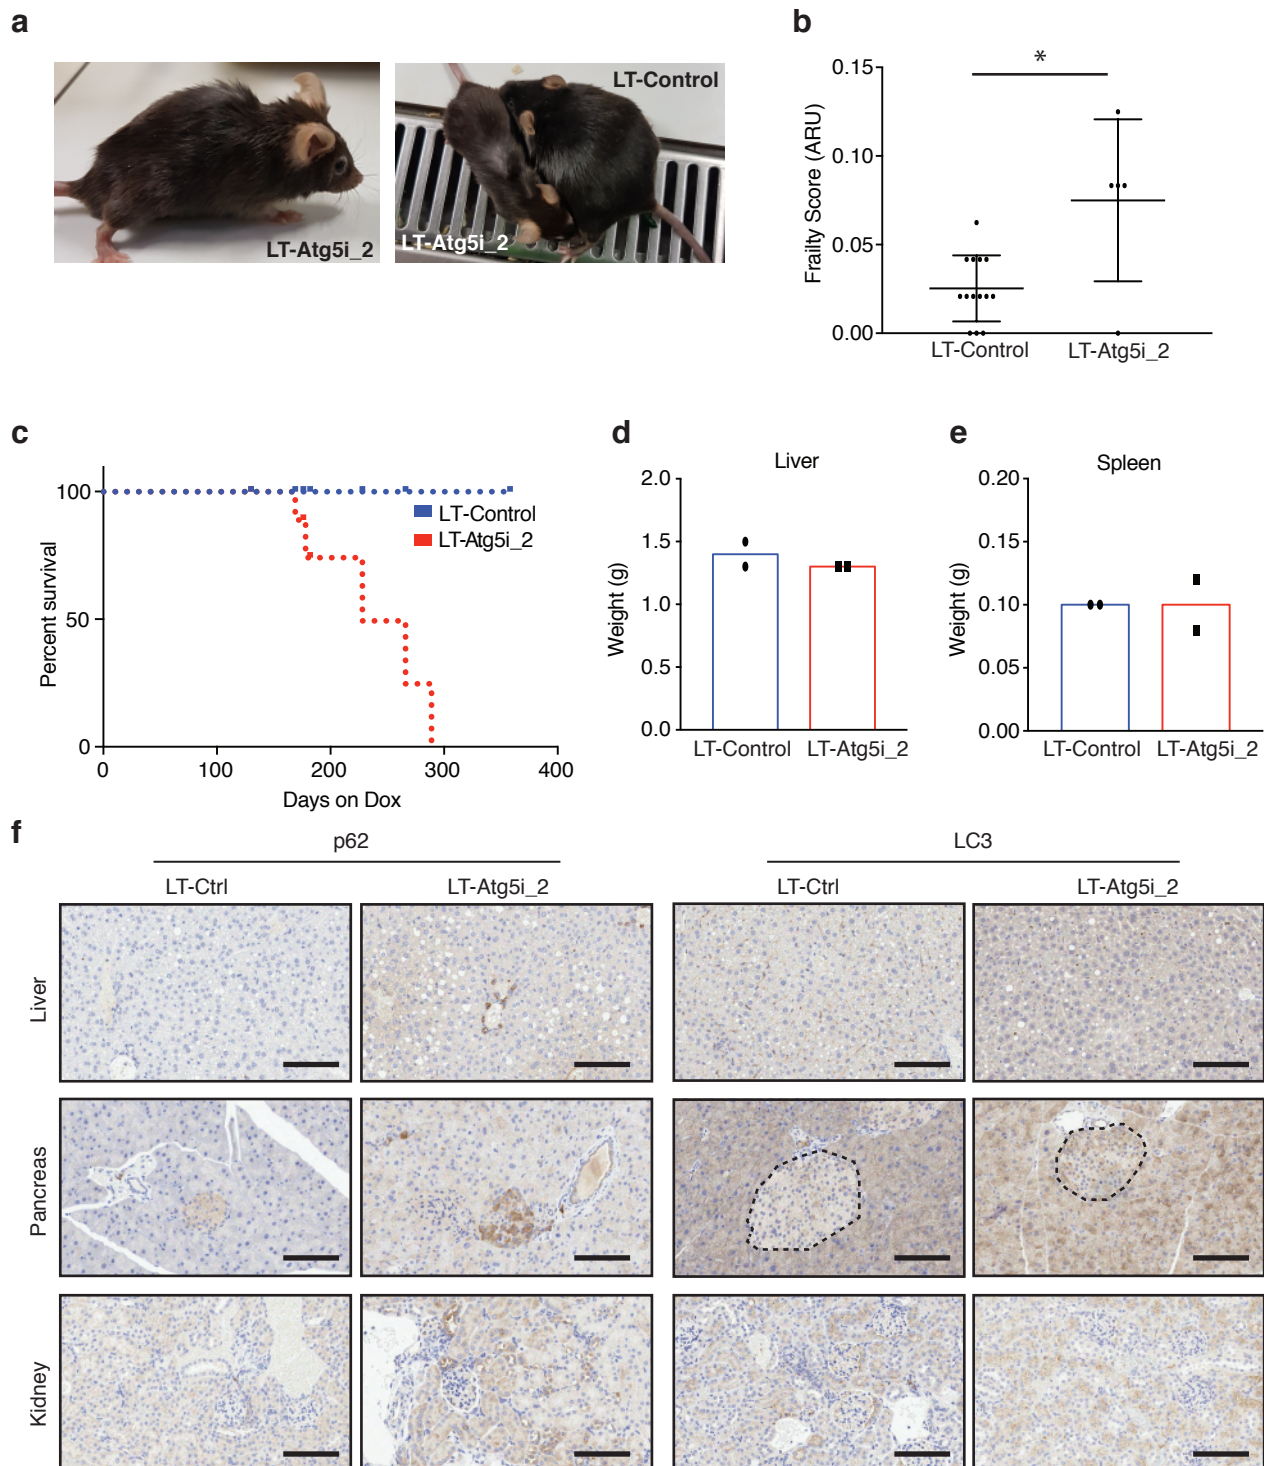

### Supplementary Figure 4: Hypomorphic LT-Atg5i\_2 mice also display aging phenotypes

**a-c**, LT-Atg5i\_2 mice phenotypically recapitulate premature ageing phenotypes including (a) kyphosis, (b) increased frailty (ARU, arbitrary units; Mann-whitney  $n=14$  LT-Control and 5 LT-Atg5i\_2 mice), and (c) reduced longevity. **d-f** However, Atg5i\_2 mice appear to have a hypomorphic phenotype and do not recapitulate the phenotypes found in Atg5 knock-out and LT-Atg5i. These include no evidence of (d) hepatomegaly or (e) splenomegaly. (f) Correspondingly, p62/SQSTM1 and LC3 levels do not accumulate to the same degree in LT-Atg5\_2 mice treated with doxycycline for 6 weeks. Scale bars, 100  $\mu\text{m}$ . Error bars indicate standard deviations. \* $p<0.05$



## Supplementary Figure 5 \_ Cassidy

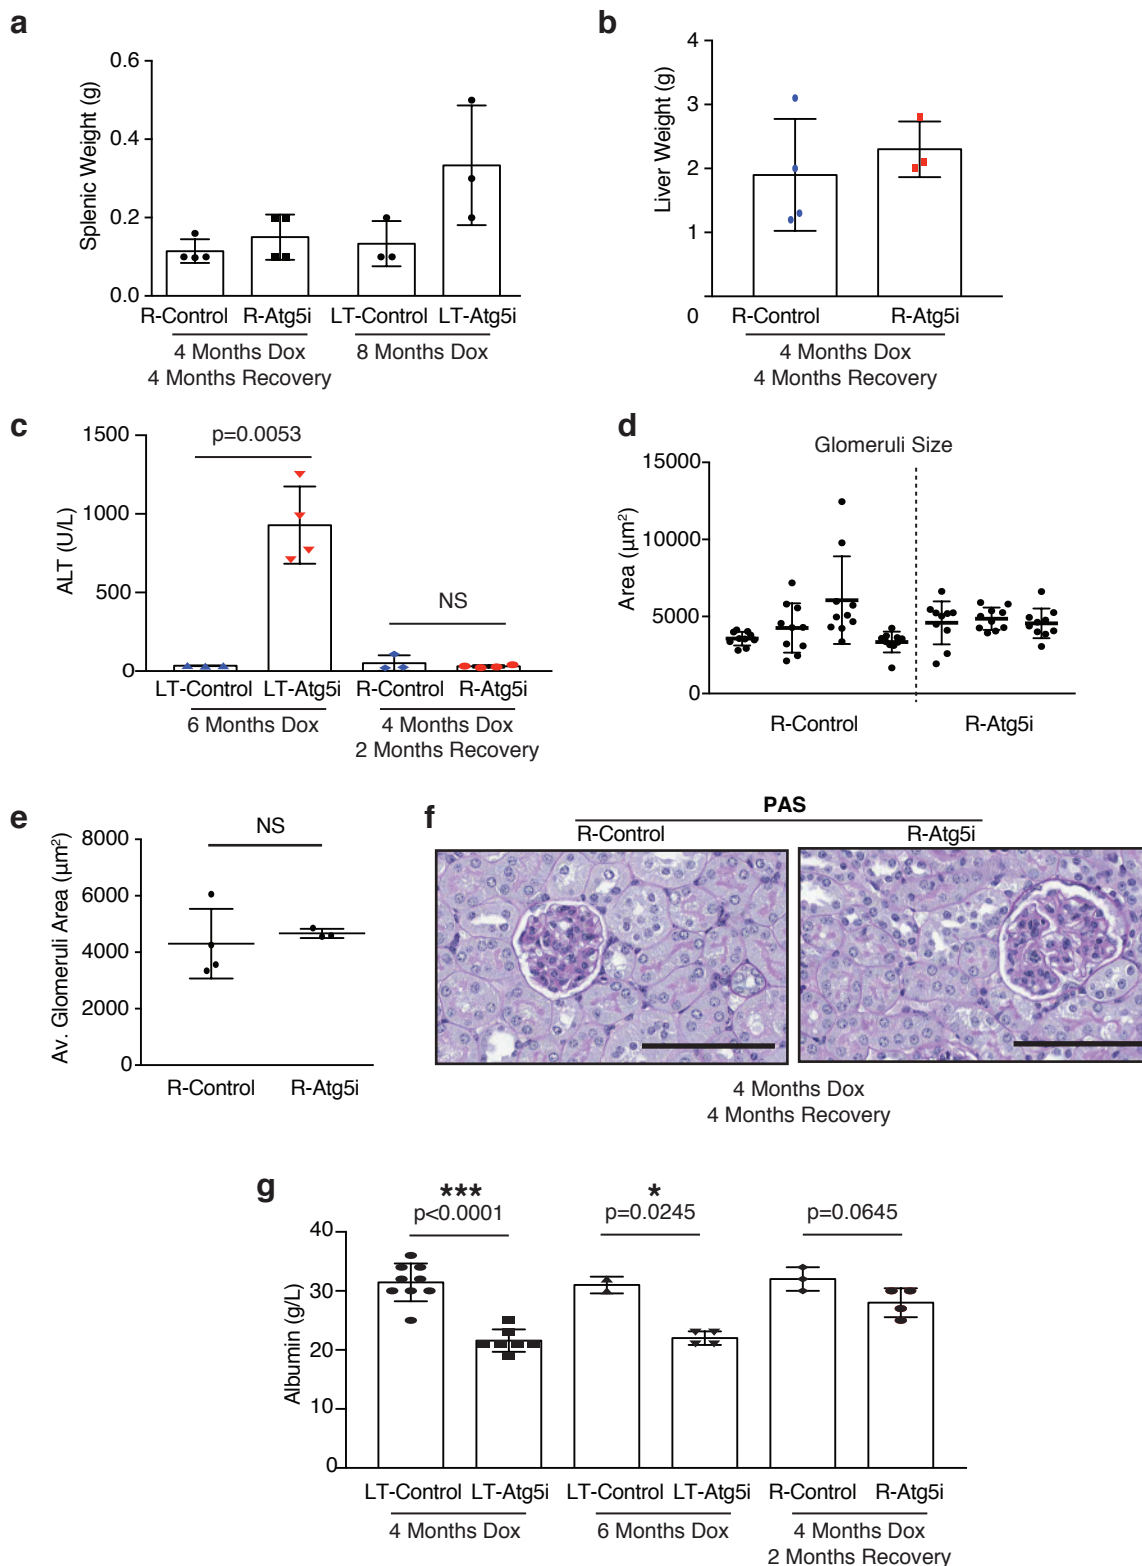

### Supplementary Figure 5: Autophagy restoration reverses hepatomegaly and splenomegaly

**a**, Splenic and **b**, liver weights from R-Atg5i mice exhibit evidence of recovery. **c**, In addition R-Atg5i mice display a reduction in serum ALT levels (unpaired two-tailed Welch's t-test;  $n=3-4$  per cohort). **d-f**, R-Atg5i mice 4 months post dox removal display evidence of recovery in the kidneys as determined by (**d-e**) normalisation of glomeruli size appeared relative to age-matched controls (unpaired two-tailed Mann whitney,  $n=3-4$  mice per group) and (**f**) the absence of sclerosis. **g**, A partial recovery in serum albumin levels is also present in these mice unpaired two-tailed Welch's t-test;  $n=2-9$  per cohort). Error bars indicate standard deviations. \* $p<0.05$ ; \*\* $p<0.01$ , \*\*\* $p<0.001$

## Supplementary Figure 6 \_ Cassidy

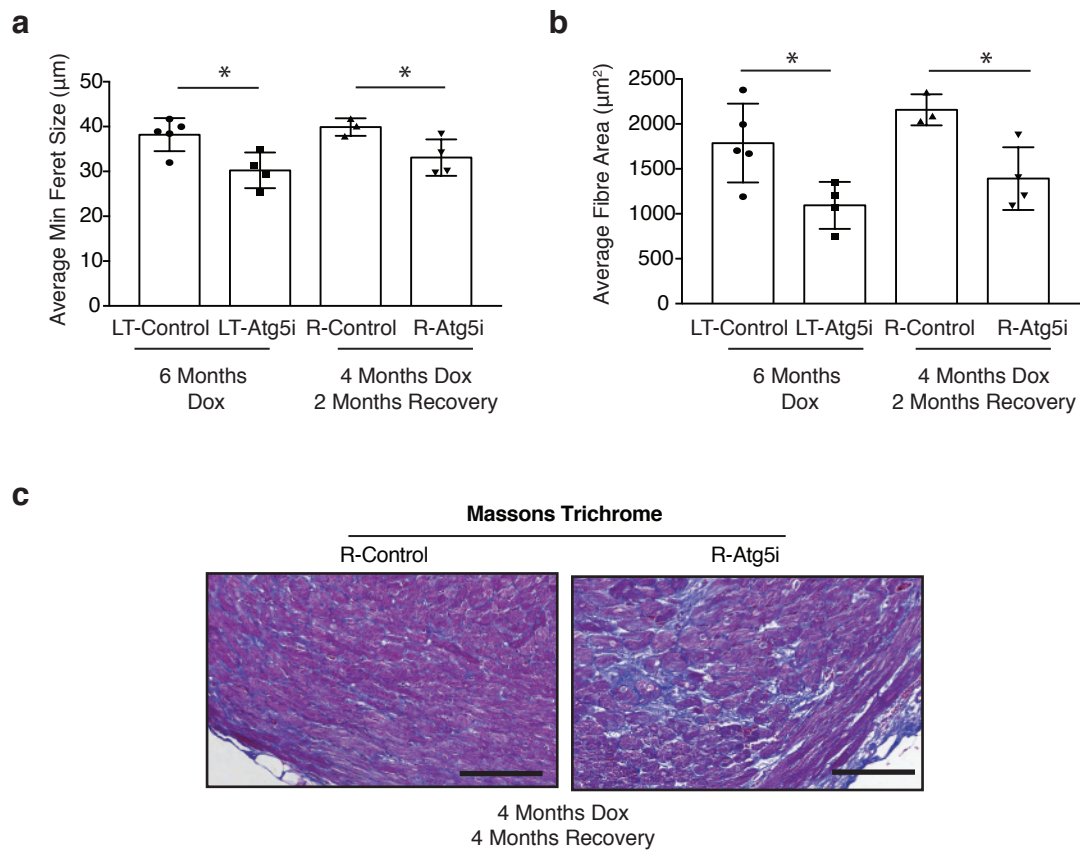

### Supplementary Figure 6: Autophagy restoration displays segmental rescue of tissue phenotypes

**a-b**, Skeletal muscle displays no rescue of phenotype once Atg5i mice are removed from dox. As determined by **(a)** minimal feret size, and **(b)** cross-sectional area. (unpaired two-tailed Welch's t-test,  $n=3-5$  per group). **c**, Cardiac fibrosis was still present in R-Atg5i mice 4 months post dox removal. Error bars indicate standard deviations.  $*p<0.05$
